1           **DYT-TOR1A Subcellular Proteomics Reveals Selective**  
2           **Vulnerability of the Nuclear Proteome to Cell Stress**

3  
4  
5                   Kunal Shroff<sup>1</sup>, Zachary F. Caffall<sup>1</sup> and Nicole Calakos<sup>1,2,3,4\*</sup>

6  
7           Departments of Neurology<sup>1</sup>, Neurobiology<sup>2</sup>, and Cell Biology<sup>3</sup>, Duke University Medical Center

8                           <sup>4</sup>Duke Institute for Brain Sciences, Duke University

9                                   Durham, North Carolina, USA

10                                   \*Corresponding E-mail: [nicole.calakos@duke.edu](mailto:nicole.calakos@duke.edu)

11

## 12 **Highlights**

- 13 • The DYT-TOR1A nuclear proteome under cell stress showed 3-fold greater protein  
14 disruptions.
- 15 • DYT-TOR1A MEFs show basal proteome alterations consistent with cell stress.
- 16 • Thapsigargin modulation of WT stress-responsive proteins is blunted in DYT-TOR1A  
17 MEFs.
- 18 • TorsinB was identified as part of the cell-stress responsive proteome in WT MEFs.

19

20

## 21 **Abstract**

22 TorsinA is a AAA<sup>+</sup> ATPase that shuttles between the ER lumen and outer nuclear  
23 envelope in an ATP-dependent manner and is functionally implicated in nucleocytoplasmic  
24 transport. We hypothesized that the DYT-TOR1A dystonia disease-causing variant,  $\Delta E$  TorsinA,  
25 may therefore disrupt the normal subcellular distribution of proteins between the nuclear and  
26 cytosolic compartments. To test this hypothesis, we performed proteomic analysis on nuclear and  
27 cytosolic subcellular fractions from DYT-TOR1A and wildtype mouse embryonic fibroblasts  
28 (MEFs). We further examined the compartmental proteomes following exposure to thapsigargin  
29 (Tg), an endoplasmic reticulum (ER) stressor, because DYT-TOR1A dystonia models have  
30 previously shown abnormalities in cellular stress responses. Across both subcellular  
31 compartments, proteomes of DYT-TOR1A cells showed basal state disruptions consistent with  
32 an activated stress response, and in response to thapsigargin, a blunted stress response. However,  
33 the DYT-TOR1A nuclear proteome under Tg cell stress showed the most pronounced and  
34 disproportionate degree of protein disruptions – 3-fold greater than all other conditions. The  
35 affected proteins extended beyond those typically associated with stress responses, including  
36 enrichments for processes critical for neuronal synaptic function. These findings highlight the  
37 advantage of subcellular proteomics to reveal events that localize to discrete subcellular  
38 compartments and refine thinking about the mechanisms and significance of cell stress in DYT-  
39 TOR1A pathogenesis.

40

41

42

43

44

## Graphical Abstract

### Cellular Stress State

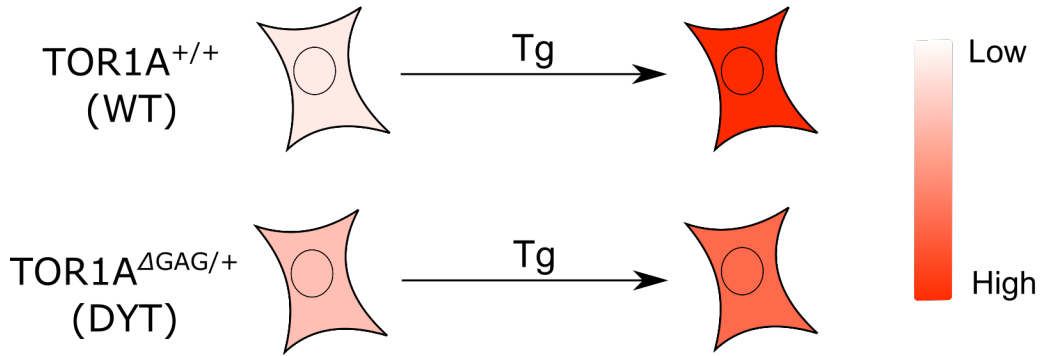

### Proteome Disruption Level (relative to WT)

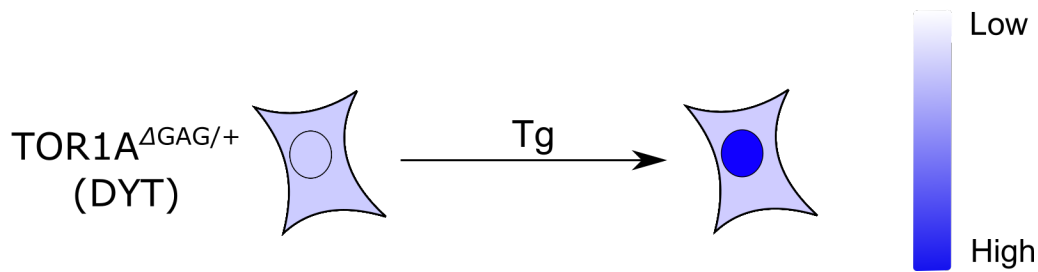

45

## 46 **Keywords**

47 Dystonia; Subcellular fractionation; TorsinA; Compartment-specific proteome; Stress Response;

48 Movement disorder

49

## 50 **Abbreviations**

51 Cyto, cytosolic fraction; DYT, DYT-TOR1A genotype; FC, fold change; GO, Gene Ontology;

52 LC, liquid chromatography; MEF, mouse embryonic fibroblast; MS, mass spectroscopy; Nuc,

53 nuclear fraction; RNC, relative nuclear concentration; RNP, ribonucleoprotein; Tg, thapsigargin;

54 Veh, vehicle control; WT, wildtype

## 55 **Introduction**

56           Dystonia is a neurological movement disorder characterized by involuntary twisting and  
57 abnormal postures of the limbs, trunk, and/or face (Tarsy & Simon, 2006). Causes for dystonia  
58 are diverse, ranging from exposure to anti-psychotic medications to neurodegenerative diseases  
59 (Balint et al., 2018; Bressman, 2004; Jankovic & Tintner, 2001; van Harten et al., 1999). DYT-  
60 TOR1A dystonia is a rare inherited autosomal dominant form of the disorder that is caused by an  
61 in-frame trinucleotide deletion in the *Tor1a* coding sequence (n.  $\Delta$ GAG, p.  $\Delta$ E) and leads to an  
62 early-onset, generalized dystonia (Ozelius et al., 1997).

63  
64           Since the discovery of *Tor1a* as the causal gene for DYT-TOR1A dystonia, a number of  
65 groups have characterized the function of the encoded protein, TorsinA, in its normal and mutant  
66 forms. TorsinA is a member of the AAA+ ATPase family of proteins. Although typically  
67 TorsinA is predominantly in the lumen of the endoplasmic reticulum, perturbations preventing  
68 ATP hydrolysis result in a prominent outer nuclear envelope distribution (Naismith et al., 2004).  
69 These observations led to a model in which the protein shuttles between these two compartments  
70 in an ATP hydrolysis-dependent manner (Naismith et al., 2004). Later studies identified two  
71 TorsinA binding partners, LAP1 and LULL1, which localize to the nuclear envelope and ER  
72 membrane, respectively (Chalfant et al., 2019; Chase et al., 2017; Esra Demircioglu et al., 2016;  
73 Goodchild & Dauer, 2005; M. T. Jungwirth et al., 2011; Laudermitch et al., 2016; Nery et al.,  
74 2008; Saunders et al., 2017; Vander Heyden et al., 2009). Thus, it was hypothesized that TorsinA  
75 likely played a role in each of these compartments. More recent studies implicate TorsinA in  
76 regulation of nucleocytoplasmic transport (Chalfant et al., 2019; Ding et al., 2021; György et al.,  
77 2018; Jokhi et al., 2013; Laudermitch et al., 2016; Rampello et al., 2019; VanGompel et al.,

78 2015). Defects in nucleoporin localization and nuclear import kinetics have been described in  
79 association with mutations in OOC-5, a TorsinA homolog in *C. elegans*, and in *Tor1a* in  
80 mammalian neuronal cultures and knockout mouse models (Chalfant et al., 2019; Pappas et al.,  
81 2018; VanGompel et al., 2015). In addition, impaired nuclear egress functions were found in  
82 both DYT-TOR1A patient fibroblasts and cultured DYT-TOR1A mouse neurons (György et al.,  
83 2018). These defects may be related to TorsinA's role in regulating nuclear budding, a process  
84 essential for nuclear egress of mega-ribonucleoproteins (megaRNPs) (Jokhi et al., 2013; Speese  
85 et al., 2012). Collectively, these findings suggest that TorsinA plays a role in regulating  
86 nucleocytoplasmic transport, and that the DYT-TOR1A-associated TorsinA mutation,  $\Delta E$ ,  
87 impairs these functions.

88

89 In addition to nucleocytoplasmic transport defects, our lab and several others have found  
90 that multiple DYT-TOR1A dystonia model systems exhibit altered cellular stress response  
91 pathways (Beauvais et al., 2016, 2018; Chen et al., 2010; Cho et al., 2014; Nery et al., 2011;  
92 Rittiner et al., 2016; Zacchi et al., 2014; Zhao et al., 2016). It is currently unknown how the  
93 DYT-TOR1A mutation specifically causes these cellular stress response defects. However,  
94 alleviation of these defects by pharmacological and genetic approaches has been shown to  
95 improve DYT-TOR1A associated cellular phenotypes (Rittiner et al., 2016), suggesting that  
96 cellular stress responses may play an important role in DYT-TOR1A disease pathophysiology.

97

98 Proteomics approaches have been previously used to study the consequences of the DYT-  
99 TOR1A causative mutation in whole cell and tissue lysate preparations (Beauvais et al., 2016,  
100 2018; Martin et al., 2009). These approaches have successfully identified disease model-

101 associated protein defects. However, because many subcellular compartments such as the  
102 nucleus comprise only a proportionally small part of the total proteome, compartment-specific  
103 defects are likely to be overlooked by such approaches. Recent studies of amyotrophic lateral  
104 sclerosis demonstrate the potential for nucleocytoplasmic proteomic analyses by identifying  
105 nucleus-specific defects in RNA transport and cytosol-specific defects in protein translation and  
106 folding (J. E. Kim et al., 2017; Ortega et al., 2020). In the present study, we adopt a similar  
107 nucleocytoplasmic fractionation technique alongside quantitative proteomics to address whether  
108 the DYT-TOR1A mutation causes subcellular compartment-specific proteomic disruptions.

109

110 Our results identify compartment- and stress-specific disruptions associated with the  
111 DYT-TOR1A genotype that include disruptions of proteins that are normally cell stress  
112 modulated and of TorsinA and TorsinB levels and localization. The most striking result however  
113 was that, despite our leading hypothesis that defects in nucleocytoplasmic transport might affect  
114 both compartments, the DYT-TOR1A mutation was found to cause the most pronounced and  
115 disproportionate insult to the nuclear proteome and selectively under cell stress. This result  
116 indicates that  $\Delta E$  TorsinA causes a particular vulnerability to the integrity of the nuclear  
117 proteome in the face of cellular stressors.

118

## 119 **Materials and Methods**

### 120 **Animals**

121 DYT-TOR1A knock-in mice (*Tor1a* <sup>$\Delta GAG/+$</sup> )(courtesy of Dr. W. Dauer, University of  
122 Michigan) (Goodchild et al., 2005) on C57BL/6 background were bred in standard housing



123 conditions with food and water provided ad libitum. All procedures were approved by the Duke  
124 University Institutional Animal Care and Use Committee (IACUC).

125

### 126 **Mouse Embryonic Fibroblast (MEF) Extraction, Isolation, and Immortalization**

127 To produce DYT-TOR1A model MEF and WT control MEF cell lines, female wildtype  
128 C57BL/6 mice were crossed with male heterozygous DYT-TOR1A knock-in mice (*Tor1a*<sup>ΔGAG/+</sup>)  
129 on a C57BL/6 background. MEF extraction occurred with minor modifications from the protocol  
130 as described in (Jozefczuk et al., 2012). Three DYT-TOR1A MEF lines and three WT MEF lines  
131 were produced from littermates of a single litter. The pregnant dam was euthanized at  
132 approximately 14 days post-coitum using isoflurane followed by decapitation. The uterine horns  
133 were dissected out and rinsed in 70% (v/v) ethanol and PBS (Gibco, Invitrogen) before placing  
134 into a Petri dish containing PBS (Gibco, Invitrogen). Each individual embryonic sac was  
135 separated from the uterine horns and placenta, and then placed into a separate dish containing  
136 PBS. Each embryo was dissected out of the embryonic sac and its head and red organs were  
137 removed. The remaining embryonic tissue was placed into a clean Petri dish where it was minced  
138 with a sterile razor blade. 1 mL of 0.05% trypsin/EDTA (Gibco, Invitrogen) was added to each  
139 dish. The mixture was transferred into a 15 mL Falcon tube and incubated at 37 °C for 30  
140 minutes. After each 10 minutes of incubation, MEFs were dissociated via pipetting. Trypsin was  
141 inactivated by adding 2 mL of fetal bovine serum-containing media (“MEF media” described in  
142 Cell Culture section below) to each tube. The MEFs were then centrifuged at 500 x g for 5  
143 minutes. The supernatant was removed, and the cell pellet was resuspended in 10 mL of warm  
144 MEF media. This solution was then plated on TC dishes coated in 1% Matrigel (Corning). After

145 2 passages, the MEFs were genotyped and subsequently immortalized via the SV40 T antigen as  
146 described in (H. Harding, 2003). Cell lines were used within 5 passages.

147

## 148 **Genotyping**

149 All genotyping was conducted as previously described in (Goodchild et al., 2005).

150

## 151 **Cell Culture**

152 MEFs were grown in MEF media which consisted of 500 mL of DMEM, high glucose,  
153 pyruvate (Thermo Fisher, #11995), 50 mL of Fetal Bovine Serum, 5 mL of Antibiotic-  
154 Antimycotic (Gibco, Invitrogen), 5 mL of 200 mM L-Glutamine (Gibco, Invitrogen), 5 mL of  
155 MEM Non-Essential Amino Acids Solution (Gibco, Invitrogen), and 500  $\mu$ L of 2-  
156 Mercaptoethanol (Sigma-Aldrich). MEFs were grown in incubators at 37 °C/5% CO<sub>2</sub>.

157

## 158 **Thapsigargin Treatment and Subcellular Fractionation**

159 Three separate experiments were performed exposing MEFs to the cell stressor,  
160 thapsigargin (Tg). During each experiment, a pair of MEF lines (1 WT and 1 DYT-TOR1A) was  
161 treated with either 1  $\mu$ M Tg dissolved in DMSO or an equivalent volume of DMSO (Vehicle  
162 control, Veh). After six hours of treatment at 37 °C, the MEFs were subcellularly fractionated  
163 into nuclear and cytosolic fractions. MEFs for subcellular fractionation were acquired through  
164 trypsinization from 90% confluent TC plates. Subcellular fractionation of MEFs was then carried  
165 out as described in (Suzuki et al., 2010). Briefly, the procedure involves a weak and brief  
166 detergent extraction (0.01% NP40, 3 min., room temperature), centrifugation to collect the  
167 supernatant (cytosolic fraction) and then further solubilization in the same buffer alongside

168 sonication to penetrate the double bilayer membranous nuclear compartment, with a second  
169 centrifugation and supernatant collection for the nuclear fraction.

170

## 171 **Western Blotting**

172 Lysates for Western analysis were produced either through the subcellular fractionation  
173 protocol described earlier or via a whole-cell lysate produced with RIPA buffer-induced cell  
174 lysis. Protein content from each lysate was determined via Bicinchoninic Acid (BCA) assay.  
175 Samples were prepared such that each sample contained an equal mass of protein and 1x  
176 Laemmli buffer. Samples were reduced and denatured with 2-mercaptoethanol and incubated at  
177 97 °C for 5 minutes. Equal volumes of sample were loaded into the wells of an SDS-PAGE gel  
178 along with a protein ladder. After 45 minutes electrophoresis at 175 V, the protein within the gel  
179 was transferred to a nitrocellulose membrane.

180

181 Following transfer, the membrane was blocked in 5% BSA solution prepared in TBST for  
182 1 hour at room temperature. The membrane was then incubated overnight on a shaker at 4 °C in  
183 blocking solution amended with the primary antibody [anti-Lamin B1 (Abcam; ab16048;  
184 1:1000), anti-GAPDH (Abcam; ab9485; 1:1000), anti-Na<sup>+</sup>/K<sup>+</sup> - ATPase (Santa Cruz  
185 Biotechnology; sc-21712; 1:500), anti-BiP (Santa Cruz Biotechnology; sc-13968; 1:500)].  
186 Following primary incubation, the membrane was washed three times with TBST for 5-10  
187 minutes each time. The membrane was then re-blocked in blocking solution for 1 hour.  
188 Membranes were then placed in blocking solution with secondary antibody [Alexa Fluor 790  
189 Goat anti-Rabbit and/or Alexa Fluor 680 Goat anti-Mouse (Thermo Fisher)] at a dilution of  
190 1:1000. The membrane was incubated in the secondary solution for 1 hour before being washed

191 three times in TBST for 5-10 minutes per wash. The membrane was imaged on a LI-COR  
192 Odyssey Imaging System. The visualized bands were quantified using ImageJ.

193

### 194 **Immunofluorescent Staining**

195 MEF lines (three WT and three DYT-TOR1A) were plated into individual wells on a 96-  
196 well plate, such that each line was plated into eight wells. Four of the wells for every line were  
197 treated with Veh and the other four wells for each line were treated with 1  $\mu$ M Tg for six hours.  
198 Following treatment, the wells were fixed with 4% paraformaldehyde, permeabilized and  
199 blocked with blocking solution (0.1% Triton-X 100 in PBS, 1% bovine serum albumin, 10%  
200 normal donkey serum) for 1 hour. The wells were then stained with a primary antibody [anti-  
201 Tbc1 (Thermo-Fisher, PA5-100346, 1:200), anti-Pds5B (Thermo-fisher; PA5-59029; 1:500)]  
202 overnight at 4°C. Following three washes with wash buffer solution (0.1% BSA in PBS),  
203 secondary staining was conducted using Hoechst 33342 (MilliporeSigma; 1:1000) to stain the  
204 nucleus and donkey Anti-rabbit Alexa Fluor 488 (Life Technologies; 1:1000) for 1 hour at room  
205 temperature. Following three additional washes with wash buffer solution, the wells were filled  
206 with dilution buffer (1% BSA, 1% normal donkey serum, 0.3% Triton X-100, and 0.01% sodium  
207 azide in PBS). Sixteen imaging fields from each well were acquired at a magnification of 20x  
208 from a Thermofisher CX5 HC imager. Images were acquired in both the blue and green channel  
209 to identify the cell nuclei and quantify the protein of interest. Following image acquisition,  
210 images were analyzed by CellProfiler 3.1.9 (McQuin et al., 2018).

211

212

213

## 214 **Immunofluorescence Quantification and Data Analysis**

215 Nuclei were identified via the blue channel Hoechst stain. The cytosol was identified via  
216 the green channel protein immunofluorescence stain and nuclear position information as  
217 determined from the blue channel Hoechst stain. Nuclear fluorescence was quantified by  
218 integrating the intensity of the green channel protein immunofluorescence across pixels  
219 identified as being part of the nucleus. Cytosolic fluorescence was quantified by integrating the  
220 intensity of the green channel protein immunofluorescence across each pixel within the region  
221 identified as being part of the cytosol.

222  
223 Puncta were identified via a modified speckle counting pipeline developed by  
224 CellProfiler (McQuin et al., 2018). Analyses were conducted on image masks containing only  
225 the nuclei, as well as image masks containing only the cytosol to quantify puncta in each of the  
226 subcellular compartments. Puncta frequency was determined by taking the number of speckles  
227 identified per image and then dividing by the number of nuclei or cytosolic areas within that  
228 image. Puncta intensity was determined by integrating the intensity of all the puncta within the  
229 field and dividing by the number of nuclei or cytosolic areas within that image.

230  
231 Each quantified value (nuclear fluorescence, cytosolic fluorescence, puncta frequency,  
232 puncta intensity) was calculated for each of the sixteen fields imaged per well and these sixteen  
233 values were averaged to produce a single mean value for each well. Unpaired t-tests were used to  
234 compare mean values from the four biological replicate wells across both genotypes with and  
235 without stress treatment.

236

## 237 **Quantitative LC/MS/MS and Proteomic Analysis**

238           Twenty-four samples in total were submitted to the Duke Proteomics and Metabolomics  
239 Shared Resource (two subcellular fractions from each of the six MEF lines treated with either Tg  
240 or Veh). While the fractions were collected over three separate cell culture experiments, they  
241 were all analyzed within a single liquid chromatography with tandem mass spectroscopy  
242 (LC/MS/MS) experiment. Fractions were first normalized to 10 µg and spiked with undigested  
243 casein at a total of 20, 30, or 40 fmol/µg, then reduced with 10 mM dithiothreitol for 30 min at  
244 80 °C, and alkylated with 20 mM iodoacetamide for 30 min at room temperature. Next, they  
245 were supplemented with a final concentration of 1.2% phosphoric acid and 741 µL of S-Trap  
246 (Protifi) binding buffer (90% MeOH/100mM TEAB). Proteins were trapped on the S-Trap,  
247 digested using 20 ng/µL sequencing grade trypsin (Promega) for 1 hour at 47°C, and eluted using  
248 50 mM TEAB, followed by 0.2% FA, and lastly using 50% ACN/0.2% FA. All fractions were  
249 then lyophilized to dryness and resuspended in 20 µL 1% TFA/2% acetonitrile containing 12.5  
250 fmol/µL yeast alcohol dehydrogenase (ADH\_YEAST). Three QC Pools were created: 1) 3 µL  
251 from each of the nuclear fractions, 2) 3 µL from each of the cytosolic fractions 3) 3 µL from each  
252 of all of the fractions, both nuclear and cytosolic. All QC Pools were run periodically randomly  
253 interspersed throughout the test fractions.

254

255           Quantitative LC/MS/MS was performed on 2 µL of each fraction, using a nanoAcquity  
256 UPLC system (Waters Corp.) coupled to a Thermo Orbitrap Fusion Lumos high resolution  
257 accurate mass tandem mass spectrometer (Thermo) via a nanoelectrospray ionization source.  
258 Briefly, the fraction was first trapped on a Symmetry C18 20 mm × 180 µm trapping column (5  
259 µL/min at 99.9/0.1 v/v water/acetonitrile), after which the analytical separation was performed

260 using a 1.8  $\mu\text{m}$  Acquity HSS T3 C18 75  $\mu\text{m} \times 250$  mm column (Waters Corp.) with a 90-min  
261 linear gradient of 5 to 30% acetonitrile with 0.1% formic acid at a flow rate of 400  
262 nanoliters/minute (nL/min) with a column temperature of 55  $^{\circ}\text{C}$ . Data collection on the Fusion  
263 Lumos mass spectrometer was performed in a data-dependent acquisition (DDA) mode of  
264 acquisition with a  $r=120,000$  (@  $m/z$  200) full MS scan from  $m/z$  375 – 1500 with a target AGC  
265 value of  $2e5$  ions. MS/MS scans were acquired at Rapid scan rate (Ion Trap) with an AGC target  
266 of  $5e3$  ions and a max injection time of 100 milliseconds. The total cycle time for MS and  
267 MS/MS scans was 2 seconds. A 20s dynamic exclusion was employed to increase depth of  
268 coverage. The total analysis cycle time for each fraction injection was approximately 2 hours.

269

270       Following 35 total UPLC-MS/MS analyses (excluding conditioning runs, but including 3  
271 replicate QC Pool, 4 replicate nuclear and 4 replicate cytosolic Pool injections), data was  
272 imported into Proteome Discoverer 2.2 (Thermo Scientific Inc.), and analyses were aligned  
273 based on the accurate mass and retention time of detected ions (“features”) using Minora Feature  
274 Detector algorithm in Proteome Discoverer. Protein levels are reported in arbitrary units (a.u.)  
275 based on the relative peptide abundance measures which were calculated by area-under-the-  
276 curve (AUC) of the selected ion chromatograms of the aligned features across all runs. The  
277 MS/MS data was searched against the SwissProt *M. musculus* database (downloaded in Apr  
278 2017) and an equal number of reversed-sequence “decoys” for false discovery rate  
279 determination. Mascot Distiller and Mascot Server (v 2.5, Matrix Sciences) were utilized to  
280 produce fragment ion spectra and to perform the database searches. Database search parameters  
281 included fixed modification on Cys (carbamidomethyl) and variable modifications on Meth  
282 (oxidation) and Asn and Gln (deamidation). Peptide Validator and Protein FDR Validator nodes

283 in Proteome Discoverer were used to annotate the data at a maximum 1% protein false discovery  
284 rate.

285  
286 Missing values were imputed after sample loading normalization in the following  
287 manner. If less than half of the values are missing across all samples, values are imputed with an  
288 intensity derived from a normal distribution defined by measured values within the same  
289 intensity range (20 bins). If greater than half values are missing for a peptide across all samples  
290 and a peptide intensity is  $> 5e6$ , then it was concluded that peptide was misaligned and its  
291 measured intensity is set to 0. All remaining missing values are imputed with the lowest 5% of  
292 all detected values. All analyses presented here are based on these normalized values. The  
293 complete proteomic dataset has been deposited with Mendeley data and is further detailed in a  
294 Data In Brief accompanying article.

295

296

## 297 **Data Analysis and Statistical Analysis**

298 Throughout the data collection phase of the study, cell genotype and stress-treatment  
299 conditions were blinded variables. Unblinding occurred upon return of processed proteomic data.

300

301 For proteomic data analysis, proteins represented by only a single peptide were removed  
302 from the data set prior to further analysis to reduce the number of Type 1 errors. Unpaired t-test  
303 p-values and fold changes for each protein were calculated for each comparison. P-values and  
304 fold changes were calculated using GSEA software from the Broad Institute via a Student's t-test  
305 (Mootha et al., 2003; Subramanian et al., 2005). Proteins that showed an uncorrected p-value less



306 than 0.05 and a DYT-TOR1A/WT or WT/DYT-TOR1A ratio greater than 1.5 (DYT-  
307 TOR1A/WT fold change greater than  $\pm \log_2(0.585)$ ) were considered as the “top hits” for further  
308 analysis. Metascape was used to conduct a Gene Ontology analysis on the top hits (Zhou et al.,  
309 2019). Top hits were analyzed using the entire discovered proteome as the background to  
310 consider for enrichment.

311

312 All other statistical testing used unpaired t-tests calculated by GraphPad Prism version  
313 8.3.1 for MacOS unless otherwise indicated.

314

## 315 **Results**

### 316 **Subcellular Fractionation of Mouse Embryonic Fibroblasts (MEFs)**

317 Immortalized murine embryonic fibroblast cell lines were prepared from *Tor1a*<sup>ΔGAG/+</sup>  
318 (genotype hereafter abbreviated as DYT-TOR1A or DYT) and wildtype (WT) littermate  
319 embryos according to standard methodology (Methods). Cultures from 3 independent lines for  
320 each genotype were grown to confluence and then treated with either 1 μM thapsigargin (Tg) or  
321 vehicle (Veh) for six hours prior to harvesting (Fig. 1A). Nuclear and cytosolic cellular fractions  
322 were prepared according to previously described methods based on serial exposure to a mild  
323 detergent extraction that does not significantly solubilize nuclear membranes, but is sufficient to  
324 penetrate plasma membrane and enable extraction of cytosolic components and organelles,  
325 followed by a nuclear membrane-solubilizing sonication step (Suzuki et al., 2010). Western  
326 analysis was performed to confirm that markers for the nuclear (Lamin B1) and the cytosolic  
327 (GAPDH, BiP, Na,K-ATPase α1) subcellular compartments were differentially distributed in the  
328 fractions as predicted in both genotypes (Fig. 1B and Fig. S1). Nuclear and cytosolic fractions

329 prepared from 3 independent cell lines for each genotype were then analyzed by quantitative  
330 liquid chromatography-tandem mass spectrometry (LC/MS/MS).

331

332 A total of 4801 proteins were detected across all samples. Of those, 3921 proteins had at  
333 least two distinct peptides and mapped to a unique mouse gene identifier using GSEA software;  
334 these proteins were used for subsequent analyses. Over 90% of proteins were identified in both  
335 subcellular fractions and treatment conditions (Fig. S2A). Recognizing that most proteins are  
336 present in both subcellular compartments to varying degrees, we next calculated the relative  
337 nuclear concentration (RNC) ( $\text{nuclear level} / \text{total}_{\text{nuclear} + \text{cytosolic}}$ ) for each of the 3921 proteins. The  
338 RNC has been used previously to characterize the proteome and demonstrated only a small  
339 fraction of proteins being almost exclusive to nuclear or cytosolic fractions, with a majority of  
340 proteins having intermediate RNC values (Wühr et al., 2015). The nucleocytoplasmic  
341 distribution of proteins in our samples is consistent with those prior observations and was similar  
342 across the two genotypes (Fig. 1C). In addition, we performed standard bioinformatic analysis  
343 using Gene Ontology (GO) on the nuclear and cytosolic fraction proteomic datasets to determine  
344 whether enrichments characteristic of nuclear and cytosolic components were detected in the  
345 corresponding fractions (For ease of presentation, results of both genotypes were combined.  
346 Individual genotype analyses yielded similar conclusions, data not shown). The top GO terms  
347 associated with proteomics of the cytosolic fractions included “cytosolic part” (Fig. 1D). In  
348 addition to cytosolic proteins, we also observed enrichment for cytosolic vesicle membrane  
349 proteins as shown by the strong enrichment of the GO terms “membrane coat” and “Ficolin-1  
350 rich granule lumen”. Conversely, the top GO terms associated with nuclear fractions included  
351 “nuclear body” (Fig. 1E). We further noted that GO analysis of the nuclear fraction also included

352 “mitochondrial membrane part” suggesting that mitochondria may be preferentially extracted  
 353 with the nuclear fraction. Together, these characterizations establish that components of the  
 354 nucleus and cytosol are relatively enriched in the nuclear and cytosolic fractions, respectively.  
 355

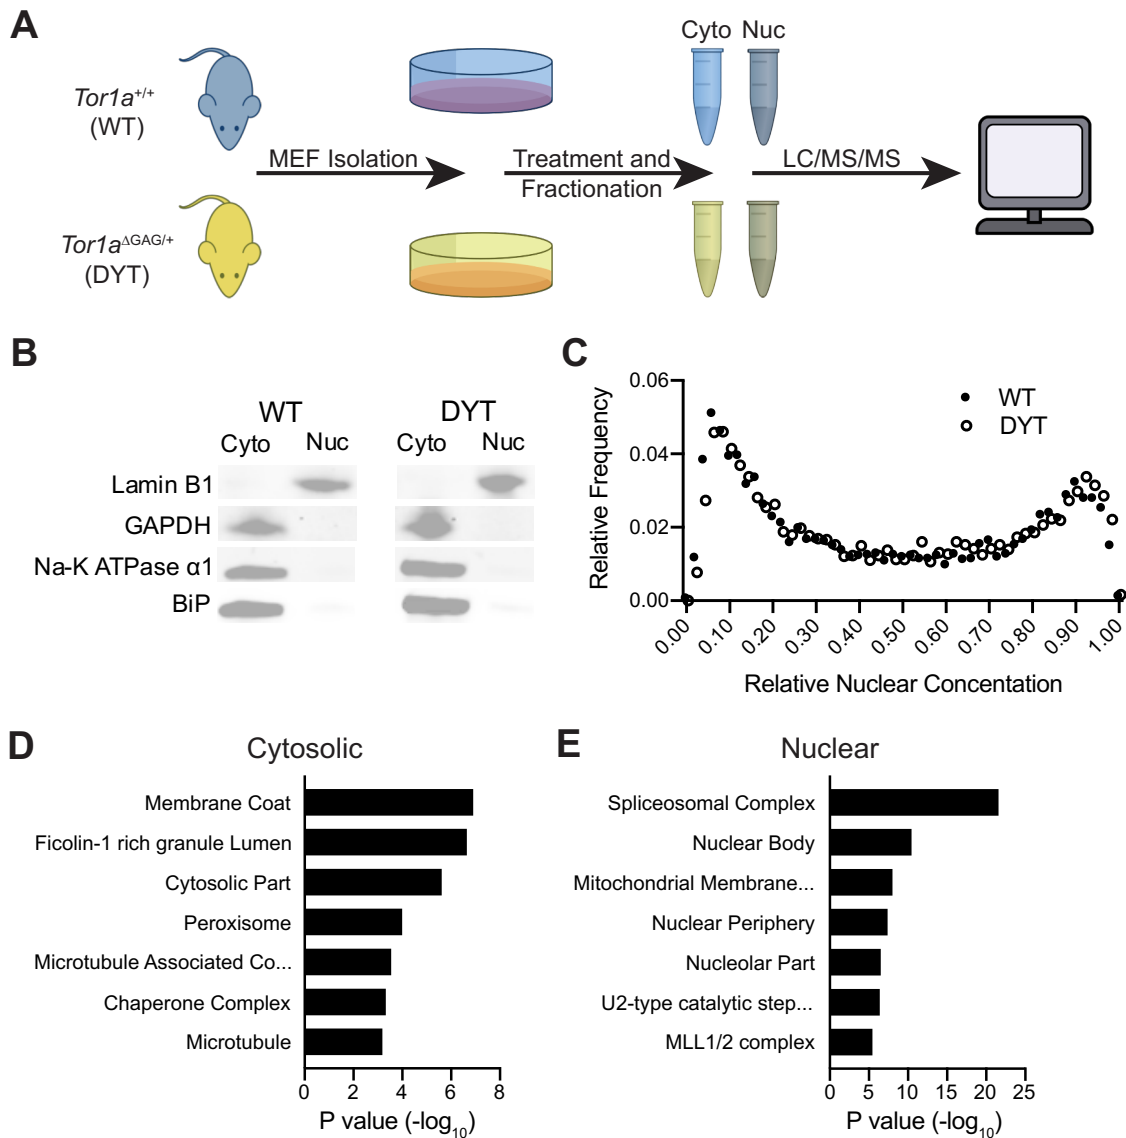

356  
 357 Fig. 1. Subcellular fractionation enriches for cytosolic and nuclear components similarly in both  
 358 WT and DYT-TOR1A cell lines. (A) Experimental design schematic. Mouse embryonic  
 359 fibroblasts (MEFs) were isolated from DYT-TOR1A heterozygous knock-in (*TOR1A*<sup>ΔGAG/+</sup>)

360 mice and wildtype litter mates. MEF lysates were fractionated into cytosolic (Cyto) and nuclear  
361 (Nuc) fractions and then subjected to quantitative differential proteomics analysis. (B)  
362 Representative Western blots of subcellular fraction markers in WT and DYT-TOR1A cell lines.  
363 The nuclear membrane marker, Lamin B1, is predominately sequestered in the nuclear fraction  
364 while GAPDH, Na-K ATPase  $\alpha$ 1, and BiP (cytosolic, plasma membrane, and endoplasmic  
365 reticulum resident proteins, respectively) are enriched in the cytosolic fraction. (C) Frequency  
366 distribution of calculated relative nuclear concentration (RNC) values across the entire proteome  
367 from WT (solid circles) and DYT-TOR1A (open circles) samples. RNC values are calculated for  
368 each individual protein by taking the protein abundance within the nuclear fraction and dividing  
369 by the sum of the nuclear and cytosolic fraction protein abundances (adapted from Wühr et al.,  
370 2015). (D-E) Gene Ontology analysis of proteins enriched within the nuclear (D) and cytosolic  
371 (E) fraction (dataset of combined genotypes using threshold of  $p < 0.001$  by t-test).

372

### 373 **DYT-TOR1A Genotype-Dependent Subcellular Proteome Differences**

374 To identify proteome differences caused by the DYT-TOR1A genotype, an average fold  
375 change (FC) and p-value were calculated for each protein by comparing levels between WT and  
376 DYT-TOR1A samples under basal conditions (Veh) ( $n = 3$  independent biological replicates per  
377 genotype). Using thresholds of an uncorrected p-value of less than 0.05 and fold change of  $\pm 1.5$   
378 FC, which corresponds to a 50% increase in DYT-TOR1A levels relative to WT or WT levels  
379 relative to DYT-TOR1A, we identified 152 proteins with genotype-dependent differences in the  
380 cytosolic fractions (Fig. 2A). A similar number of differences were identified in the nuclear  
381 fractions (Fig. 2B). There was less than 3% overlap between the differentially affected proteins  
382 in the nuclear and cytosolic samples (Fig. S2B). Gene Ontology analysis of differentially

383 affected proteins revealed enrichment of proteins associated with mitochondrion organization  
384 and ATP metabolism (Fig. S3). This GO term enrichment was present in both the nuclear and  
385 cytosolic DYT-TOR1A-disrupted protein datasets (Fig. S3). These results are consistent with  
386 processes that have been previously implicated in DYT-TOR1A dystonia (Beauvais et al., 2016;  
387 Martin et al., 2009).

388  
389 Prior studies have also described numerous cellular stress response defects in DYT-  
390 TOR1A dystonia models (Beauvais et al., 2016; Chen et al., 2010; C. E. Kim et al., 2010; Nery  
391 et al., 2011; Rittiner et al., 2016; Zhao et al., 2016). Because many of these defects are apparent  
392 only following stress treatment, we additionally performed the proteomic experiment in samples  
393 after six hours of thapsigargin (Tg) exposure, a compound that causes cell stress by releasing  
394 internal calcium stores. With Tg treatment, we found that cytosolic samples showed a similar  
395 number of genotype-dependent differences as non-stressed (Veh) samples (115 proteins) (Fig.  
396 2C). However, in striking contrast to cytosolic fractions, Tg treatment caused a greater than 3-  
397 fold increase in genotype-dependent differences in the nuclear proteome (624 proteins) relative  
398 to the non-stressed samples (187 proteins) (Fig. 2D). These data reveal that among cytosolic and  
399 nuclear compartments in basal and stressed states, the DYT-TOR1A genotype most severely  
400 disrupts the composition of the nuclear proteome and does so selectively in the presence of a  
401 cellular stressor.

402  
403 Given the similarity in the number of protein differences between the cell stress and basal  
404 conditions in the cytosolic fractions, we next examined the extent to which genotype-dependent  
405 differences were due to the same proteins being affected in multiple conditions. Surprisingly,

406 there was little overlap - with less than 10% of proteins being shared between the stressed and  
407 basal state conditions (Fig. S2B). These findings indicate that, in both the nuclear and cytosolic  
408 fractions, the proteome disruptions caused by DYT-TOR1A under cell stress affects proteins that  
409 are largely distinct from those in the basal state.

410

411 Next, we evaluated genotype-dependent differences in the subcellular fractionation of  
412 TorsinA itself. Multiple prior studies have found that the DYT-TOR1A mutation of *Tor1a* ( $\Delta E$   
413 TorsinA) drives TorsinA mislocalization from the ER to the nuclear envelope (Bragg et al.,  
414 2004; Calakos et al., 2010; Gonzalez-Alegre & Paulson, 2004; Goodchild & Dauer, 2004;  
415 Hewett et al., 2000; Kustedjo et al., 2000; Liang et al., 2014; Naismith et al., 2004; Torres et al.,  
416 2004). The results for TorsinA were not included in our proteomic analysis because TorsinA was  
417 identified by only a single unique identifying peptide, and this is associated with an increased  
418 risk for misidentifying proteins (Carr et al., 2004). However, given the particular relevance of  
419 TorsinA data to this study, we used the single peptide data to examine its distribution between  
420 nuclear and cytosolic compartments. We found that relative to WT samples, TorsinA levels were  
421 significantly lower in cytosolic fractions of DYT-TOR1A samples ( $p = 0.004$ ) and that there was  
422 also a non-significant trend toward higher levels of TorsinA in nuclear fractions of DYT-TOR1A  
423 samples ( $p = 0.232$ ) significantly altering its distribution to be biased towards the nuclear  
424 compartment (N/C ratio) (Fig. 2E).

425

426 Interpretation of data from our approach and most other subcellular proteomic  
427 approaches relies upon the assumption that cell constituents fractionate normally (Ortega et al.,  
428 2020; Tribl et al., 2005). In Figure 1B-C, we observed that there were no obvious solubilization

429 differences between WT and DYT-TOR1A MEFs. Nonetheless, for any specific protein of  
430 interest, the use of an orthogonal methodology would be a desirable validation step. To date,  
431 conventional immunofluorescence has not revealed the TorsinA redistribution in genetic  
432 construct-valid DYT-TOR1A cells that we detected here using quantitative proteomics. To  
433 better understand the misdistribution of  $\Delta E$  TorsinA and address the integrity of nuclear  
434 envelope partitioning in DYT-TOR1A cells, we evaluated the partitioning of known nuclear  
435 envelope proteins, the LINC complexes in WT and DYT-TOR1A MEFs (Fig. S4). We found  
436 that LINC proteins present in our datasets enriched in the nuclear fraction as expected and  
437 partitioned similarly in WT and DYT-TOR1A samples. We also present two examples of  
438 conventional ICC validation. Levels of Tbc1e and Pds5b were significantly altered in DYT-  
439 TOR1A in the nuclear compartment under Tg cell stress condition (Fig. S5-S6). Proteomic  
440 analysis of Tbc1e showed a compartment-specific decrease in the Tg-nucleus and no difference in  
441 cytosolic levels (Fig. S5B, D); findings which were replicated with conventional ICC (Fig. S5C,  
442 E). Pds5b levels were significantly increased in DYT-TOR1A Tg-nuclear samples (Fig. S6B).  
443 Using ICC, nuclear Pds5b immunostaining intensity was significantly different by genotype;  
444 however, instead of increased, Pds5b staining was significantly decreased in DYT-TOR1A (Fig.  
445 S6C). Interestingly, in WT cells, Pds5b was more commonly in strongly staining puncta, raising  
446 the possibility that reduced solubility of punctate Pds5b might give rise to the proteomic result of  
447 lower levels in WT cells (Fig. S6D, E). To summarize, while ICC for both proteins confirmed  
448 genotype effects, these two examples highlight the range of disruptions that might underlie the  
449 proteomic results.

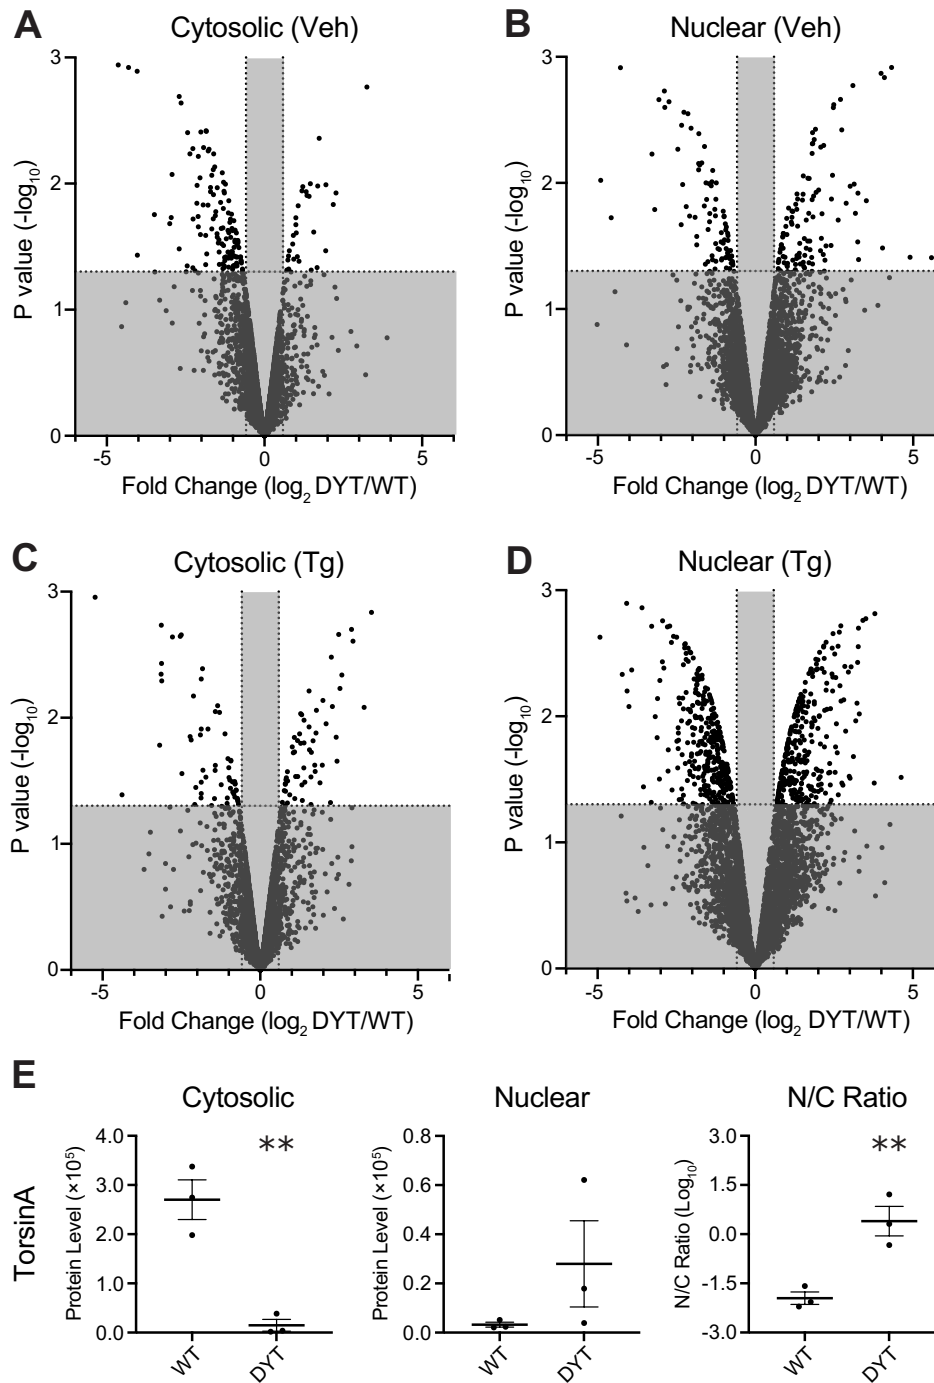

450

451 Fig. 2. Compartment-specific proteome disruptions associated with DYT-TOR1A MEFs. (A-B)

452 Volcano plots showing proteome-wide differences in protein abundances between DYT-TOR1A

453 and WT cytosolic (A) and nuclear (B) fractions under basal conditions (Veh). Differences in



454 protein abundance are represented as fold change (using  $\log_2$  transform) and p-value is calculated  
455 by unpaired t-test for each protein (n=3 biological replicates). Horizontal dashed line indicates p-  
456 value less than 0.05. Vertical dashed lines indicate fold changes of  $\pm 1.5$ . (C-D) Corresponding  
457 volcano plots for fractions from thapsigargin-treated (Tg) cells. (E) Relative TorsinA peptide  
458 levels (a.u.) in cytosolic (Veh) and nuclear (Veh) fractions and the nuclear:cytosolic (N/C) ratio.  
459 Error bars indicate S.E.M.. For all comparisons, n = 3 biological replicates, p-value determined  
460 by unpaired t-test (\*\*p<0.01).

461

## 462 **Thapsigargin Stress-Responsive Proteins in WT MEFs**

463 Thus far, our proteomic analyses reveal that the largest DYT-TOR1A genotype-  
464 dependent disruption to the proteome was observed in the nuclear compartment under cell stress.  
465 Since a number of prior studies have shown abnormalities in cell stress responses in DYT-  
466 TOR1A models, we asked whether the nuclear proteomic disruptions were predominantly  
467 composed of proteins whose levels were normally modulated by cell stress. To address this, we  
468 first used the WT datasets to identify the normal subset of stress-responsive proteins – i.e.  
469 proteins whose levels significantly changed in response to thapsigargin cell stress. For each  
470 protein and subcellular fraction of the WT samples, the ratio of levels in the Tg and Veh  
471 conditions were calculated. Using thresholds of  $\pm 1.5$  FC and p-value < 0.05, we identified a total  
472 of 513 proteins that we hereafter refer to as the “stress-responsive proteins”.

473

474 Consistent with the global reduction in protein synthesis rates that occurs following ER  
475 stress (Ron, 2002), Tg cell stress tended to downregulate more proteins (373 proteins) than it  
476 upregulated (140 proteins) (Fig. 3A-B). Among the upregulated stress-responsive proteins in WT

477 samples, GO analysis revealed significant enrichment for proteins associated with the PERK-  
478 mediated unfolded protein response ( $p=0.002$ , Fold Enrichment = 10.8). This enrichment is  
479 expected given that thapsigargin is thought to promote cellular stress response through a PERK-  
480 dependent mechanism (H. P. Harding et al., 2000). Individual examples of two proteins  
481 associated with this pathway, Herpud1 and NF $\kappa$ B p105, are shown (Fig. 3C-D).

482

483         Lastly, in reviewing the stress-responsive proteins we identified in WT samples, we were  
484 surprised to see the paralog of TorsinA, TorsinB, among them. TorsinB levels were significantly  
485 increased by stress in the nuclear fractions and decreased in the cytosolic fractions, resulting in a  
486 greater than doubling of its relative nucleocytoplasmic distribution (nuclear:cytosolic protein  
487 levels = N/C ratio) (Fig. 3E). A similar trend was seen for TorsinA (Fig. 3F). This finding  
488 suggests for the first time that redistribution of Torsin proteins toward the nucleus may be part of  
489 the normal cellular stress response.

490

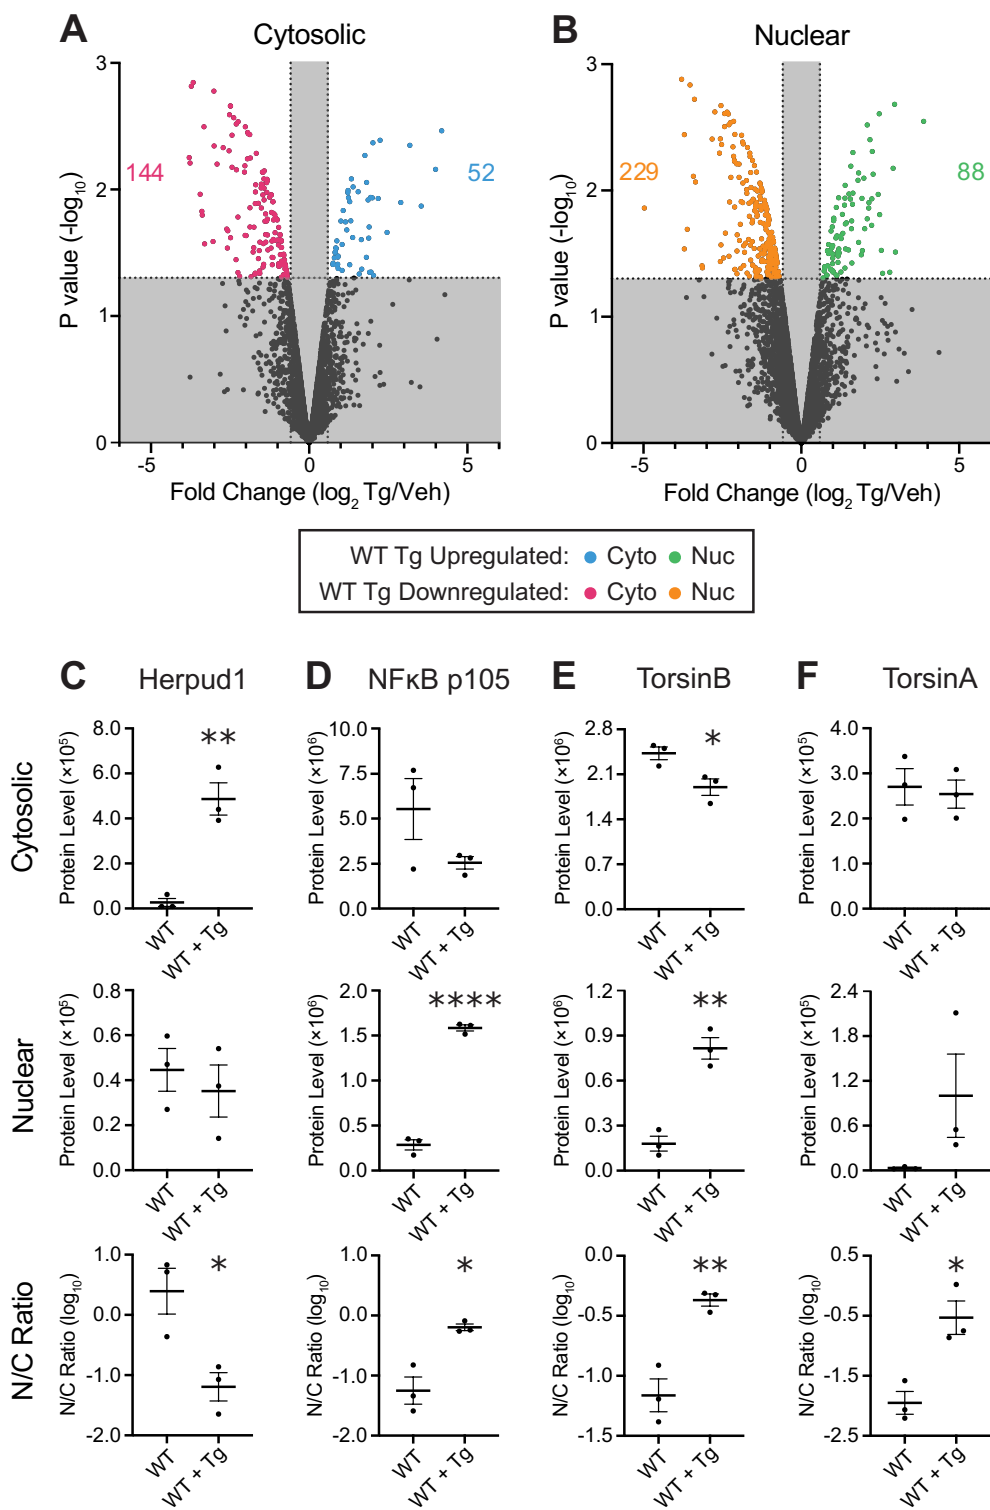

492 Fig. 3. Thapsigargin stress modulation of protein levels in wildtype MEFs. (A-B) Volcano plots  
493 showing proteome-wide differences in protein abundances due to thapsigargin (Tg) treatment in  
494 wildtype cytosolic (A) and nuclear (B) fractions. Differences in protein abundance are  
495 represented as fold change (using  $\log_2$  transform) and p-value is calculated by unpaired t-test for  
496 each protein (n=3 biological replicates). Horizontal dashed line indicates p-value less than 0.05.  
497 Vertical dashed lines indicate fold changes of  $\pm 1.5$  fold change (FC) (C-F) Cytosolic and nuclear  
498 fraction protein levels (a.u.) and the corresponding nuclear:cytosolic (N/C) ratios are shown for  
499 Herpud1, NF $\kappa$ B p105, TorsinB, and TorsinA in Veh (WT) and Tg treatment (WT + Tg)  
500 conditions (n = 3 biological replicates; \*p<0.05;\*\*p<0.01;\*\*\*\*p<0.0001, unpaired t-test). Error  
501 bars indicate S.E.M..

502

### 503 **DYT-TOR1A MEFs Show Basal Elevations and Blunted Stress Responses of** 504 **Normally Stress-Responsive Proteins**

505 Having defined the normal stress-responsive shifts in the proteome, we next evaluated  
506 whether the WT stress-responsive proteins were enriched among DYT-TOR1A disrupted  
507 proteins. We found that stress-responsive proteins were significantly enriched among the DYT-  
508 TOR1A disrupted proteins. This enrichment was present across all conditions and subcellular  
509 fractions. To visualize this, in Fig. 4 we show the DYT-TOR1A/WT comparison datasets using  
510 the color scheme from Fig. 3 to indicate the nature of the WT stress response (i.e. upregulated or  
511 downregulated in Fig. 3A-B). Notably, under basal conditions (Veh), WT stress-responsive  
512 proteins were not uniformly distributed but rather tended to align with the directionality of their  
513 normal modulation by cell stress. As a group, the proteins upregulated by thapsigargin within  
514 WT MEFs were significantly enriched among the subset of proteins upregulated in DYT-TOR1A

515 basally (Cyto:  $p=7.68e-8$ ; Nuc:  $p=5.98e-12$ ) (Fig. 4A-B). Similarly, the group of proteins  
516 downregulated by Tg treatment in WT MEFs were significantly enriched among the subset of  
517 proteins downregulated in DYT-TOR1A basally (Cyto:  $p=6.92e-6$ ; Nuc:  $p=8.81e-11$ ) (Fig. 4A-  
518 B). This analysis reveals that the basal state proteome of DYT-TOR1A MEFs reflects an  
519 activated cell stress state prior to exogenous Tg cell stress treatment.

520

521 Following Tg stress treatment, we again found significant overlap between the normal  
522 (WT) stress-responsive proteins and DYT-TOR1A genotype-dependent protein disruptions in  
523 both subcellular compartments (Fig. 4C-D). However, under Tg cell stress, the directionality of  
524 the genotype-dependent disruptions was opposite to that of the normal stress response (visualized  
525 by the colored symbols concentrating on the opposite side of the volcano plots, Fig. 4C-D).

526 Upregulated WT stress-responsive proteins were significantly enriched among the subset of  
527 downregulated proteins in Tg-treated DYT-TOR1A fractions when compared to Tg-treated WT  
528 fractions (Cyto:  $p=4.38e-12$ ; Nuc:  $p=9.92e-3$ ) (Fig. 4C-D). Likewise, downregulated WT stress-  
529 responsive proteins were significantly enriched among the subset of upregulated proteins in Tg-  
530 treated DYT-TOR1A fractions compared to Tg-treated WT fractions (Cyto:  $p=4.67e-13$ ; Nuc:  
531  $p=2.09e-12$ ) (Fig. 4C-D). These findings are consistent with a blunted stress response in DYT-  
532 TOR1A MEFs following Tg cell stress.

533

534 At the level of individual proteins, we noticed that these same trends could be seen in the  
535 N/C ratios of NF $\kappa$ B p105 and TorsinA, but also, that for others, stress-regulation was unaffected  
536 by the DYT-TOR1A genotype (e.g. Herpud1 and TorsinB) (Fig. 5A-D, S3). Given this variation,  
537 we sought to quantify the average degree of modulation across the entire population of WT

538 stress-responsive proteins. We measured the fold change for each of the 140 WT stress-  
539 upregulated proteins and 373 WT stress-downregulated proteins in each condition relative to its  
540 level in the basal state WT samples (Veh), and then calculated the mean fold change for all up-  
541 or downregulated proteins in each condition (Fig. 5E-F). This analysis shows that in the basal  
542 state, levels of WT stress-responsive proteins in DYT-TOR1A samples already have modulations  
543 in the direction consistent with stress responses – the mean level of WT stress-upregulated  
544 proteins was ~60 percent ( $p = 8.63e-19$ ) higher than WT basal levels, while the mean level of  
545 WT stress-downregulated proteins was ~15 percent lower ( $p = 1.95e-5$ ). These findings indicate  
546 that the nuclear and cytosolic proteomes in DYT-TOR1A MEFs show modulations consistent  
547 with a stressed state basally.

548

549 In WT cells, cell stress by Tg exposure caused a threefold change in the mean level of  
550 upregulated and downregulated WT stress-responsive proteins (Fig. 5E-F). By comparison, in  
551 DYT-TOR1A MEFs, Tg caused only a twofold change in the levels of these same WT stress-  
552 responsive proteins (upregulated:  $p = 8.63e-19$ ; downregulated:  $p = 3.40e-16$ ) (Fig. 5E-F). These  
553 results indicate that while the DYT-TOR1A proteome does respond to cellular stress, the  
554 magnitude of the response is significantly reduced.

555

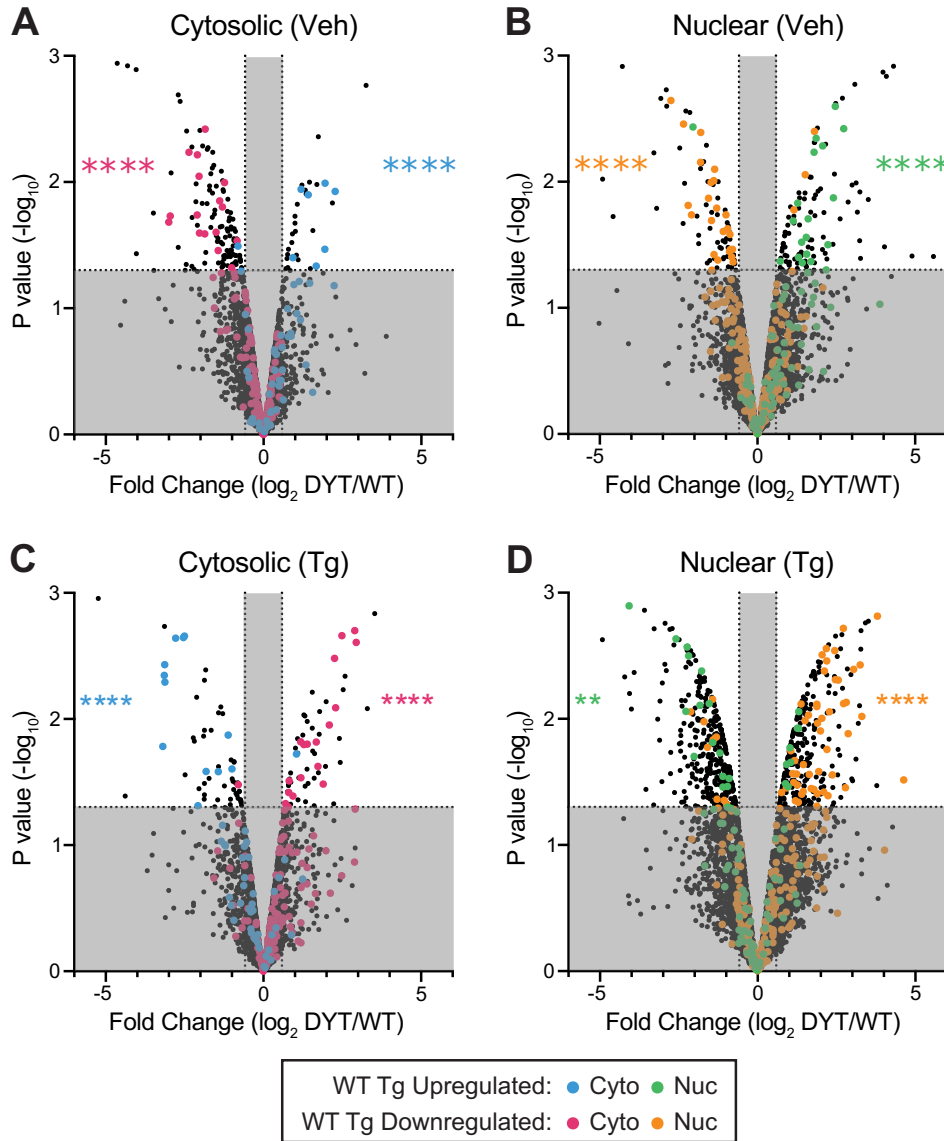

556

557 Fig. 4. WT Tg-stress-responsive proteins are non-randomly distributed among DYT-TOR1A  
558 genotype-dependent proteome disruptions. Volcano plots showing proteome-wide differences in  
559 protein abundances between DYT-TOR1A and WT cytosolic and nuclear fractions under basal  
560 (A, B) and thapsigargin-treated (C, D) conditions. For proteins found to be Tg-modulated in WT  
561 samples (Fig. 3), the directionality of the WT sample modulation is indicated by symbol color  
562 (see Legend). Differences in protein abundance are represented as fold change (using  $\log_2$   
563 transform) and p-value is calculated by unpaired t-test for each protein (n=3 biological

564 replicates). Horizontal dashed line indicates p-value less than 0.05. Vertical dashed lines indicate  
565 fold changes of  $\pm 1.5$  FC. Asterisks indicate p-value calculated by Fisher's exact test for overlap  
566 between the indicated subsets of DYT1 disrupted proteins and WT Tg-stress-responsive proteins  
567 in the white quadrants (\*\*p<0.01; \*\*\*\*p<0.0001).

568



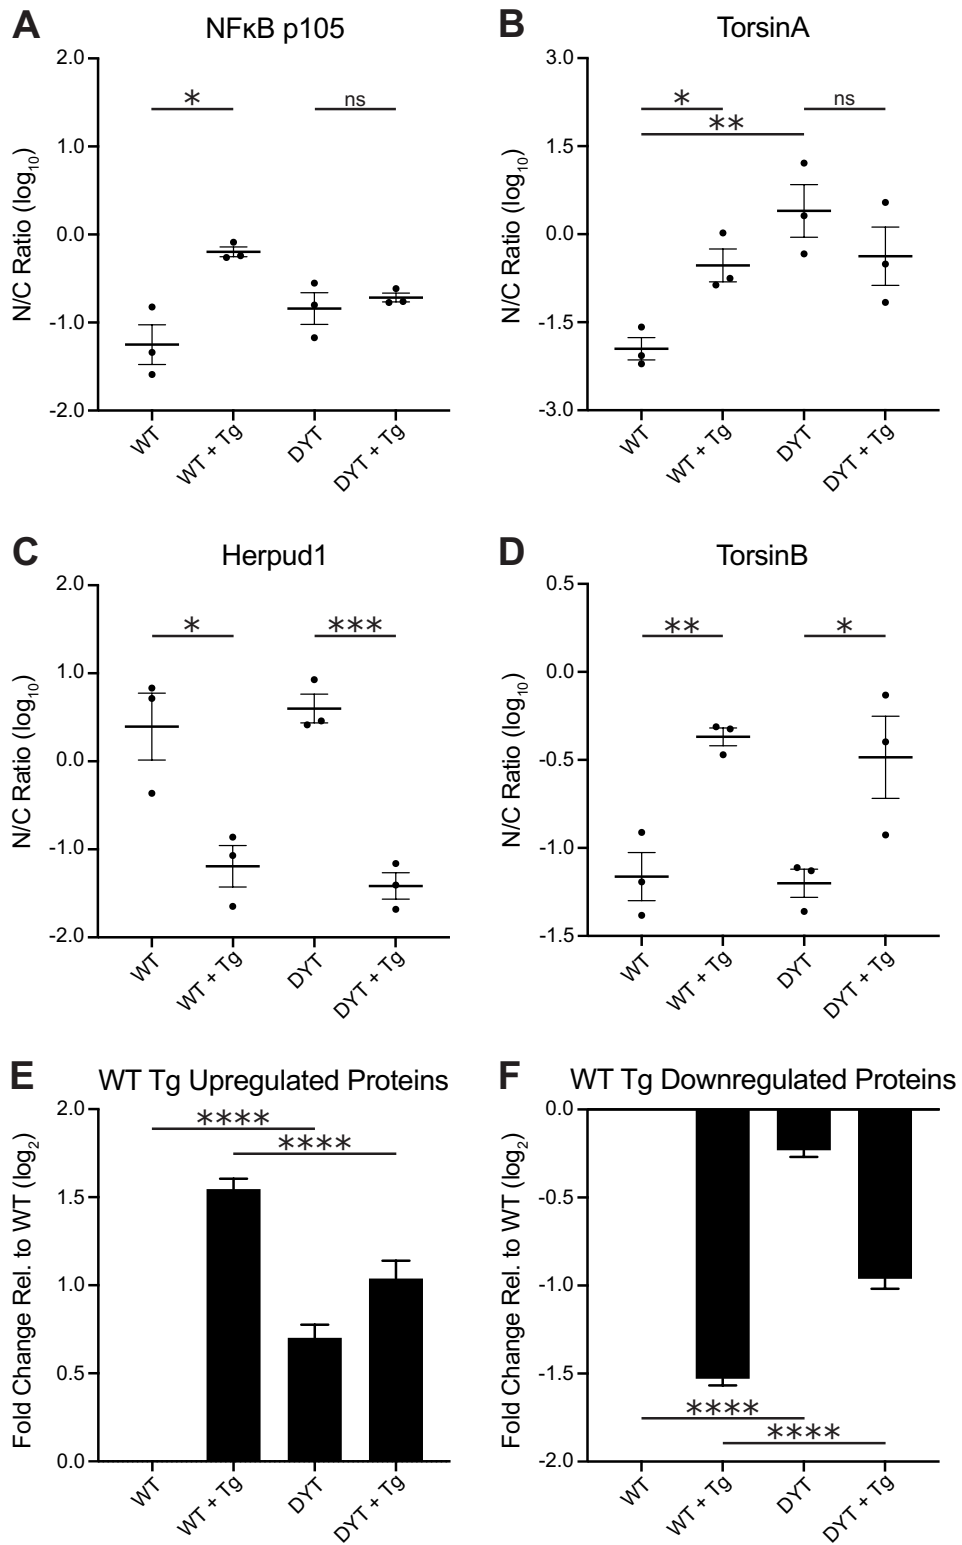

570 Fig. 5. DYT-TOR1A MEFs show proteome-wide disruptions consistent with an elevated basal-  
571 state stress response and a blunted response to Tg stress. (A-D) Individual protein examples of  
572 Tg stress-induced shifts in protein abundance between nuclear and cytosolic fractions are shown  
573 for NF $\kappa$ B p105 (A), TorsinA (B), Herpud1 (C), and TorsinB (D) in WT and DYT-TOR1A MEFs  
574 (n=3 biological replicates) (\*p<0.05; \*\*p<0.01; \*\*\*p<0.001, unpaired t-test). (E-F) Mean fold  
575 change calculated across all WT Tg-stress-responsive upregulated (n=140) (E) and  
576 downregulated (n=373) (F) proteins. For this calculation, protein levels (a.u.) from WT and  
577 DYT-TOR1A fractions treated with either Tg or Veh were normalized to the protein level  
578 measured in the WT Veh-treated fraction from the same subcellular compartment (n=3 FC  
579 values per protein to calculate mean value). Significance was determined by unpaired t-test  
580 between mean FC values for 140 upregulated stress-responsive proteins (E)(\*\*\*\*p<0.0001) and  
581 373 downregulated stress-responsive proteins (F)(\*\*\*\*p<0.0001). Error bars indicate S.E.M..  
582

### 583 **Dysregulation of WT Stress-Responsive Proteins Does Not Explain**

### 584 **Accentuated Proteome Disruption in Stressed Nuclear DYT-TOR1A**

### 585 **Fractions**

586 Thus far, we have found that WT stress-responsive proteins are significantly enriched  
587 among the proteins whose levels are disrupted by DYT-TOR1A (Fig. 4). Because this  
588 enrichment is similarly observed in both subcellular compartments and under both basal and Tg  
589 cell stress (Fig. 4), it cannot explain the large, Tg and nucleus-selective disruption of 624  
590 proteins caused by DYT-TOR1A. Moreover, stress-responsive proteins explain only 13% of the  
591 total number of disrupted proteins in the Tg nuclear samples (Fig. 6A). We therefore sought to  
592 further understand the nature of the proteins disrupted by DYT-TOR1A in the nucleus under

593 stress (Fig. 6A-C). A GO analysis was performed on the set of 624 proteins differentially  
 594 regulated in DYT-TOR1A + Tg nuclear fractions as compared to the WT + Tg nuclear fractions  
 595 (Fig. 6D, Table S1). Enrichments included “neuron cellular homeostasis” (p=0.002, Fold  
 596 Enrichment=4.5), “mRNA-containing ribonucleoprotein (RNP) complex export from the  
 597 nucleus” (p=0.004, Fold Enrichment = 1.8), and “axonal transport” (p=0.006, Fold  
 598 Enrichment=2.3) (Fig. 6D and Table S1). These GO terms suggest that in addition to the  
 599 pervasive disruptions in cell stress responses, the DYT-TOR1A genotype may also cause  
 600 particular liabilities in the nucleus under cell stress among proteins generally important for  
 601 synaptic and neuronal function.  
 602

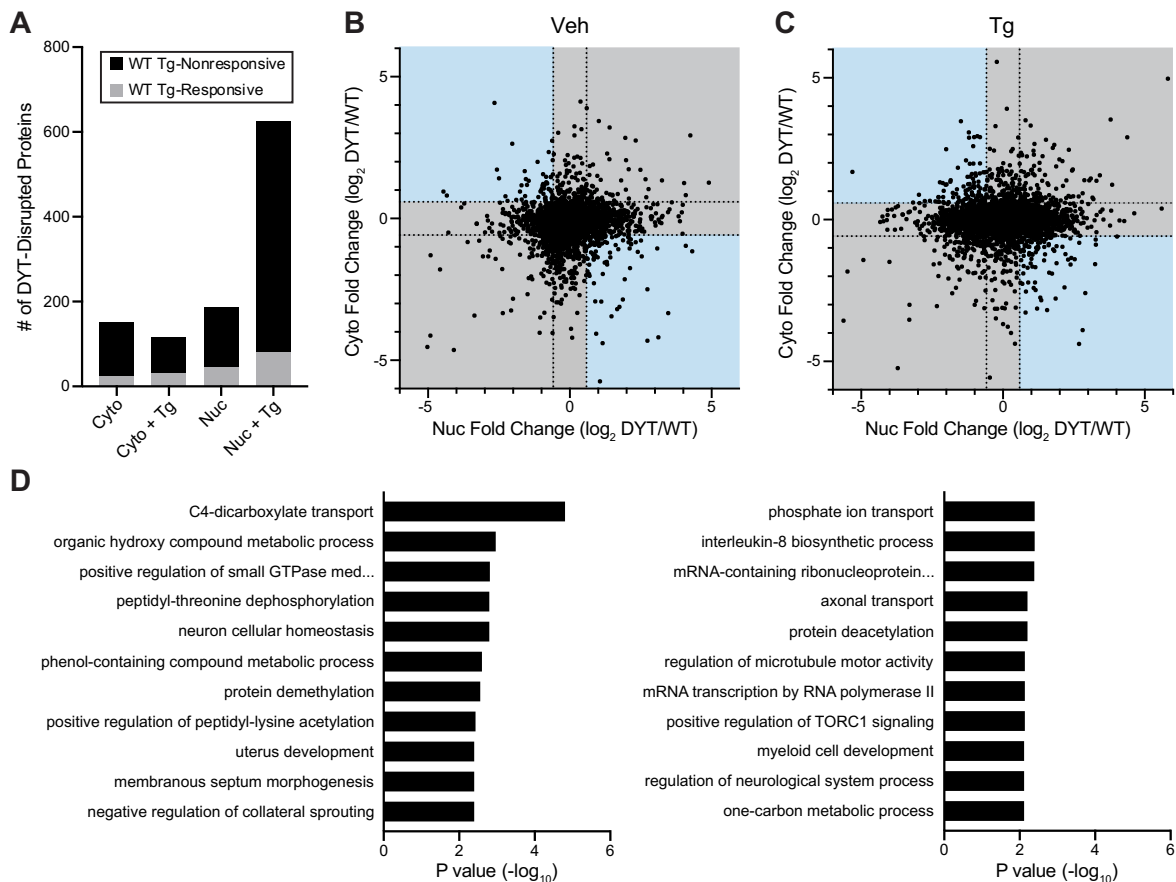

604 Fig. 6. Stress-dependent nuclear proteome disruptions in DYT-TOR1A MEFs associate with  
605 critical neuronal processes. (A) Absolute number of proteins with significant genotype effects  
606 ( $FC > \pm 1.5$ ,  $p < 0.05$ ) in each cellular fraction and treatment condition. (B, C) Proteome-wide  
607 results for genotype effects comparing directionality of fold change between the nuclear and  
608 cytosolic compartments in the vehicle (B) and thapsigargin (C) conditions. Blue shading denotes  
609 zones of reciprocal relationships. Gray shaded regions are FC less than  $\pm 1.5$ . (D) Gene Ontology  
610 analysis of the 624 proteins in the Tg-nuclear fractions with significant DYT-TOR1A genotype-  
611 dependent effects ( $FC > \pm 1.5$ ,  $p < 0.05$ ).

612

## 613 Discussion

614 In this study, we performed quantitative proteomic analysis of nuclear and cytosolic-  
615 enriched fractions prepared from DYT-TOR1A and WT MEFs in order to identify cell  
616 compartment-specific disruptions. This proteomic approach was driven by our hypothesis that  
617 some protein level disruptions caused by the DYT-TOR1A genotype may differentially manifest  
618 between the nuclear and cytosolic compartments given associations of TorsinA and  $\Delta E$  TorsinA  
619 with nuclear envelope structure and nuclear transport functions (Chase et al., 2017; Ding et al.,  
620 2021; Gonzalez-Alegre & Paulson, 2004; Goodchild et al., 2005; Goodchild & Dauer, 2004,  
621 2005; György et al., 2018; Jokhi et al., 2013; M. T. Jungwirth et al., 2011; Laudermilch et al.,  
622 2016; Naismith et al., 2004; Nery et al., 2011; Pappas et al., 2018; Rampello et al., 2019; Tanabe  
623 et al., 2016; VanGompel et al., 2015). To date, proteomic studies of dystonia have examined  
624 whole cell and tissue lysates (Beauvais et al., 2016; Martin et al., 2009; Zakirova et al., 2018).  
625 Using nucleocytoplasmic proteomics, we discovered that the DYT-TOR1A mutation  
626 disproportionately causes the nuclear proteome to be disrupted by cell stress. There were 3-fold

627 more disrupted proteins in the thapsigargin-treated nuclear proteome than any other condition  
628 (Fig. 6). Although this effect occurred under Tg cell stress and we found that levels of many  
629 proteins that were normally modulated by Tg were disrupted in DYT-TOR1A, the majority of  
630 the affected proteins were not part of the WT stress-responsive subset. In addition to this novel  
631 finding, our datasets provide further support for several prior observations in the field. For  
632 example, in both subcellular compartments, DYT-TOR1A samples show evidence of impaired  
633 mitochondrial function and stress responses (Beauvais et al., 2016; Cao et al., 2005; Chen et al.,  
634 2010; Martin et al., 2009; Nery et al., 2011; Rittiner et al., 2016).

635  
636 To begin to address the potential impact of the stress-dependent nuclear proteome  
637 disruptions in DYT-TOR1A MEFs on dystonia pathophysiology, we conducted Gene Ontology  
638 analysis. Despite the source cells being non-neuronal, a number of GO terms with particular  
639 importance for neuronal function were enriched (Fig. 6). These include: “Neuron Cellular  
640 Homeostasis”, “Negative Regulation of Collateral Sprouting”, “mRNA-containing  
641 Ribonucleoprotein Complex Export from the Nucleus”, “Axonal Transport”, “Regulation of  
642 Microtubule Motor Activity”, “Positive Regulation of TORC1 Signaling”, and “Regulation of  
643 Neurological System Process”. One of the identified biological functions enriched among the  
644 stress-dependent nuclear proteome disruptions caused by the DYT-TOR1A genotype was  
645 “mRNA-containing ribonucleoprotein complex export from the nucleus”. Prior studies have  
646 made an association between a particular type of RNP complex, a “megaRNP” and TorsinA  
647 function (Jokhi et al., 2013). In *D. melanogaster*, nuclear egress of the megaRNP is essential for  
648 proper synaptic development of the neuromuscular junction (Speese et al., 2012). More  
649 generally, ribonucleoprotein complexes are known to play an integral role in the maintenance,

650 stress response, and plasticity of synapses, and RNP disruptions are associated with a number of  
651 neurological diseases (Khalil et al., 2018; Ross Buchan, 2014). Therefore, taken together, the GO  
652 processes involving RNP complexes, transport processes, and neuronal homeostasis are  
653 potentially interrelated and predict impact on critical brain processes. Our findings suggest that  
654 these processes may be most disrupted in settings of cell stress - whether due to inherent states,  
655 such as development, or exogenous cell stressors. An important future direction is to determine  
656 whether the stress-dependent vulnerability of the nuclear proteome observed in this study also  
657 exists within the mammalian central nervous system and, if so, which neural cells are most  
658 affected by this vulnerability.

659

660 Our proteomic data identify protein levels that differ because of the DYT-TOR1A  
661 genotype. In interpreting these data, there are a number of factors that could lead to altered  
662 protein levels. Such factors include changes in protein synthesis rates, protein degradation rates,  
663 transport between subcellular compartments or aggregation state. TorsinA is well known to  
664 move between the lumen of the endoplasmic reticulum and the outer nuclear envelope in an  
665 ATP-hydrolysis dependent manner (Goodchild & Dauer, 2004, 2005; Naismith et al., 2004;  
666 Vander Heyden et al., 2009; Zhao et al., 2013). Moreover, a number of experimental approaches  
667 have shown that TorsinA deletion or  $\Delta E$  TorsinA overexpression disrupts this trafficking and  
668 nuclear envelope structure (Ding et al., 2021; Gonzalez-Alegre & Paulson, 2004; Goodchild et  
669 al., 2015; Goodchild & Dauer, 2004; M. T. Jungwirth et al., 2011; Naismith et al., 2004; Torres  
670 et al., 2004; Vander Heyden et al., 2009). We therefore found it notable that our proteomic data  
671 did not provide support for a model where  $\Delta E$  TorsinA restricts protein trafficking between the  
672 nucleus and cytosol. More specifically, we performed an analysis across the entire detected

673 proteome irrespective of the p-values to determine if we could detect even a trend for proteins to  
674 show reciprocal relationships between nuclear and cytosolic fractions (i.e. lowering in one  
675 compartment and increasing in the other) (Fig. 6B-C, blue areas). Such changes would be  
676 represented in the colored quadrants of those graphs and create an elliptical skewing. However,  
677 in this analysis, we saw no trends for reciprocal changes. Instead, we see that basally, there was  
678 little if any skew (Fig. 6B) and that with thapsigargin, the major modulation was restricted to the  
679 nuclear compartment (e.g. data expanding horizontally, nuclear fold-change axis) with little  
680 change vertically (cytosolic fold-change axis) (Fig. 6C). We therefore favor models other than  
681 nucleocytoplasmic transport defects to explain the bulk of proteome disruption in DYT-TOR1A  
682 MEFs. As one example of alternative models, compartment-specific protein level disruptions  
683 could arise by dysregulation of compartment-specific protein degradation mechanisms, such as  
684 the nuclear proteasome or ER-associated degradation mechanisms (Enenkel, 2014; Nery et al.,  
685 2011). We are interested in testing this possibility in future studies.

686  
687 In addition to identifying nuclear compartment-specific disruptions that were largely  
688 unrelated to WT stress-responsive proteins, we also made a number of novel observations about  
689 the integrity of the stress response in DYT-TOR1A cells. Foremost among these, by using a  
690 proteome-wide approach as opposed to monitoring a small number of proteins of interest, we  
691 found that, as a group, proteins whose levels were normally modulated by cell stress (in this  
692 experiment, by thapsigargin) tended to show deviations toward their stress response in the basal  
693 state in DYT-TOR1A cells (Fig. 4,5E-F). This result suggests that the DYT-TOR1A genotype  
694 induces a basally elevated stress state.

695

696 Basal elevation of the cellular stress response has been observed in other DYT-TOR1A  
697 cellular models. For example, BiP, a key stress-responsive protein, is upregulated in an  
698 unstressed *C. elegans* DYT-TOR1A transgenic model (Chen et al., 2010). In this study, the  
699 investigators further noted that in response to cell stress (using tunicamycin, a glycosylation  
700 inhibitor), DYT-TOR1A model worms had an exaggerated BiP response. Tunicamycin increased  
701 BiP expression in both WT and DYT-TOR1A samples, but to a greater degree in DYT-TOR1A.  
702 To explain the elevated stress response both basally and following stress, the authors speculated  
703 that DYT-TOR1A cells have a reduced buffering capacity against cell stress. In our data, we  
704 confirm the observations of Chen and colleagues – levels of BiP are greater in DYT-TOR1A  
705 than WT basally and increase more in DYT-TOR1A than WT in response to thapsigargin (Fig.  
706 S7B). However, by looking at the entire set of experimentally identified stress-responsive  
707 proteins, we further recognized that the BiP response was not representative of the average  
708 response to cell stress in DYT-TOR1A MEFs. Instead, we find that the DYT-TOR1A genotype  
709 *lowers* the overall stress response relative to WT (Fig. 5E-F). Blunting of the stress response has  
710 also been reported in primary fibroblasts from DYT-TOR1A patients and cerebellar tissue from  
711 DYT-TOR1A mouse models (Beauvais et al., 2016; Rittiner et al., 2016). Based on our new  
712 findings, we postulate that homeostatic dysregulation of stress signaling pathways may have  
713 developed due to the chronically elevated stress response in DYT-TOR1A cells that exists prior  
714 to exogenous stress treatment. An important area for future studies in DYT-TOR1A is to identify  
715 the biological mechanisms inciting basal cell stress and driving homeostatic dysregulation.

716  
717 Although our proteomic experiments were not designed to address single protein-level  
718 hypotheses, our results make three preliminary novel observations regarding Torsins. First, to



719 our knowledge, we make the first observation that TorsinB is a stress-responsive protein.  
720 Second, levels of TorsinA also appear to be stress-modulated. However, in contrast to TorsinB,  
721 TorsinA stress modulation is impaired (occluded) in DYT-TOR1A cells, while the response of  
722 TorsinB appears normal (Fig. 5B, D). This difference between TorsinA and TorsinB is  
723 noteworthy because a number of prior studies have highlighted the potential for TorsinB to  
724 substitute for loss of TorsinA function in DYT-TOR1A (M. Jungwirth et al., 2010; Tanabe et al.,  
725 2016; Vasudevan et al., 2006), including a recent study which shows that overexpression of  
726 TorsinB rescues abnormal movement phenotypes observed in forebrain specific *Tor1a* and  
727 *Tor1a/Tor1b* combined conditional knockout as well as selective *Tor1a*<sup>ΔGAG</sup> knock-in mouse  
728 models (Li et al., 2020). Our data provide additional support for the rationale of such therapeutic  
729 approaches. Third and last, with the sensitivity afforded by proteomic methodologies, we find  
730 that TorsinA is mislocalized toward the nuclear compartment in DYT-TOR1A cells with genetic  
731 construct validity. Although mislocalization of ΔE TorsinA has been widely observed across labs  
732 and experimental settings (Bragg et al., 2004; Calakos et al., 2010; Gonzalez-Alegre & Paulson,  
733 2004; Goodchild & Dauer, 2004; Hewett et al., 2000; Kustedjo et al., 2000; Liang et al., 2014;  
734 Naismith et al., 2004; Torres et al., 2004), to our knowledge it has never been documented in a  
735 construct-valid genetic model for DYT-TOR1A dystonia (e.g. *Tor1a*<sup>ΔGAG/+</sup>). Our results  
736 therefore provide experimental support for the idea that ΔE TorsinA mislocalization exists in the  
737 genetically relevant setting and it may only be the matter of degree that differs from  
738 overexpression models.

739

740

741

## 742 **Conclusions**

743           We have newly identified a stress-dependent and nuclear compartment-specific proteome  
744 disruption caused by the DYT-TOR1A genotype. Our findings suggest that key brain processes  
745 involving neuronal homeostasis, transport, and RNP export may be selectively impaired in DYT-  
746 TOR1A by cell stress through effects on the nuclear proteome. Alongside further understanding  
747 TorsinA's role in modifying cellular stress responses, our results open a new research direction  
748 for DYT-TOR1A dystonia pathophysiology which is to understand this compartment-specific  
749 vulnerability and its consequences for brain function.

750

751

752 Author Contributions:

753

754 KS – Conceptualization, Investigation, Formal analysis, Writing – Original Draft, Review &  
755 Editing

756 ZFC –Supervision, Validation, Writing – Review & Editing

757 NC – Conceptualization, Funding acquisition, Supervision, Writing – Review & Editing

758

759

760

761 Acknowledgements:

762

763 The authors wish to acknowledge critical expertise and suggestions provided by Shataakshi

764 Dube, William Dauer, Connor King, Miranda Shipman, Erik Soderblom and the Duke

765 Proteomics and Metabolomics Core. K.S. thanks the members of his undergraduate thesis

766 committee, Ron Grunwald and Matthew Oliver, for continued support and guidance.

767

768

769

770 Funding:

771

772 Huang Undergraduate Summer Research Fellowship (K.S.), Duke Health Scholar award (N.C.),

773 Cure Dystonia Now (N.C.), Dystonia Medical Research Foundation (N.C.) and Tyler’s Hope for

774 a Dystonia Cure (N.C.).

775

776

777

778 Declarations of Competing Interest:

779

780 The authors have no competing financial interest.

781

## 782 **References**

- 783 Balint, B., Mencacci, N. E., Valente, E. M., Pisani, A., Rothwell, J., Jankovic, J., Vidailhet, M.,  
784 & Bhatia, K. P. (2018). Dystonia. *Nature Reviews Disease Primers*, 4(1), 1–23.  
785 <https://doi.org/10.1038/s41572-018-0023-6>
- 786 Beauvais, G., Bode, N. M., Watson, J. L., Wen, H., Glenn, K. A., Kawano, H., Charles Harata,  
787 X. N., Ehrlich, M. E., & Gonzalez-Alegre, P. (2016). *Disruption of Protein Processing in*  
788 *the Endoplasmic Reticulum of DYT1 Knock-in Mice Implicates Novel Pathways in Dystonia*  
789 *Pathogenesis*. <https://doi.org/10.1523/JNEUROSCI.0669-16.2016>
- 790 Beauvais, G., Rodriguez-Losada, N., Ying, L., Zakirova, Z., Watson, J. L., Readhead, B., Gadue,  
791 P., French, D. L., Ehrlich, M. E., & Gonzalez-Alegre, P. (2018). Exploring the Interaction  
792 Between eIF2 $\alpha$  Dysregulation, Acute Endoplasmic Reticulum Stress and DYT1 Dystonia in  
793 the Mammalian Brain. *Neuroscience*, 371, 455–468.  
794 <https://doi.org/10.1016/j.neuroscience.2017.12.033>
- 795 Bragg, D. C., Kaufman, C. A., Kock, N., & Breakefield, X. O. (2004). Inhibition of N-linked  
796 glycosylation prevents inclusion formation by the dystonia-related mutant form of torsinA.  
797 *Molecular and Cellular Neuroscience*, 27(4), 417–426.  
798 <https://doi.org/10.1016/j.mcn.2004.07.009>
- 799 Bressman, S. B. (2004). Dystonia genotypes, phenotypes, and classification. In *Advances in*  
800 *neurology*.
- 801 Calakos, N., Patel, V. D., Gottron, M., Wang, G., Tran-Viet, K. N., Brewington, D., Beyer, J. L.,  
802 Steffens, D. C., Krishnan, R. R., & Züchner, S. (2010). Functional evidence implicating a  
803 novel TOR1A mutation in idiopathic, late-onset focal dystonia. *Journal of Medical*  
804 *Genetics*, 47(9), 646–650. <https://doi.org/10.1136/jmg.2009.072082>

- 805 Cao, S., Gelwix, C. C., Caldwell, K. A., & Caldwell, G. A. (2005). Torsin-mediated protection  
806 from cellular stress in the dopaminergic neurons of *Caenorhabditis elegans*. *Journal of*  
807 *Neuroscience*, 25(15), 3801–3812. <https://doi.org/10.1523/JNEUROSCI.5157-04.2005>
- 808 Carr, S., Aebersold, R., Baldwin, M., Burlingame, A., Clauser, K., & Nesvizhskii, A. (2004).  
809 The need for guidelines in publication of peptide and protein identification data: Working  
810 group on publication guidelines for peptide and protein identification data. In *Molecular*  
811 *and Cellular Proteomics* (Vol. 3, Issue 6, pp. 531–532). American Society for Biochemistry  
812 and Molecular Biology. <https://doi.org/10.1074/mcp.T400006-MCP200>
- 813 Chalfant, M., Barber, K. W., Borah, S., Thaller, D., & Lusk, C. P. (2019). Expression of TorsinA  
814 in a heterologous yeast system reveals interactions with luminal domains of LINC and  
815 nuclear pore complex components. *Molecular Biology of the Cell*, 30(5), 530–541.  
816 <https://doi.org/10.1091/mbc.E18-09-0585>
- 817 Chase, A. R., Laudermilch, E., Wang, J., Shigematsu, H., Yokoyama, T., & Schlieker, C. (2017).  
818 Dynamic functional assembly of the Torsin AAA+ ATPase and its modulation by LAP1.  
819 *Molecular Biology of the Cell*. <https://doi.org/10.1091/mbc.E17-05-0281>
- 820 Chen, P., Burdette, A. J., Porter, J. C., Ricketts, J. C., Fox, S. A., Nery, F. C., Hewett, J. W.,  
821 Berkowitz, L. A., Breakefield, X. O., Caldwell, K. A., & Caldwell, G. A. (2010). The early-  
822 onset torsion dystonia-associated protein, torsinA, is a homeostatic regulator of endoplasmic  
823 reticulum stress response. *Human Molecular Genetics*, 19(18), 3502–3515.  
824 <https://doi.org/10.1093/hmg/ddq266>
- 825 Cho, J. A., Zhang, X., Miller, G. M., Lencer, W. I., & Nery, F. C. (2014). 4-Phenylbutyrate  
826 Attenuates the ER Stress Response and Cyclic AMP Accumulation in DYT1 Dystonia Cell  
827 Models. *PLoS ONE*, 9(11), e110086. <https://doi.org/10.1371/journal.pone.0110086>

- 828 Ding, B., Tang, Y., Ma, S., Akter, M., Liu, M. L., Zang, T., & Zhang, C. L. (2021). Disease  
829 modeling with human neurons reveals lmn1 dysregulation underlying dyt1 dystonia.  
830 *Journal of Neuroscience*. <https://doi.org/10.1523/JNEUROSCI.2507-20.2020>
- 831 Enenkel, C. (2014). Nuclear transport of yeast proteasomes. In *Biomolecules* (Vol. 4, Issue 4, pp.  
832 940–955). MDPI AG. <https://doi.org/10.3390/biom4040940>
- 833 Esra Demircioglu, F., Sosa, B. A., Ingram, J., Ploegh, H. L., & Schwartz, T. U. (2016).  
834 Structures of torsinA and its disease-mutant complexed with an activator reveal the  
835 molecular basis for primary dystonia. *ELife*. <https://doi.org/10.7554/eLife.17983>
- 836 Gonzalez-Alegre, P., & Paulson, H. L. (2004). Aberrant Cellular Behavior of Mutant TorsinA  
837 Implicates Nuclear Envelope Dysfunction in DYT1 Dystonia. *Journal of Neuroscience*,  
838 24(11), 2593–2601. <https://doi.org/10.1523/JNEUROSCI.4461-03.2004>
- 839 Goodchild, R. E., Buchwalter, A. L., Naismith, T. V., Holbrook, K., Billion, K., Dauer, W. T.,  
840 Liang, C. C., Dear, M. L., & Hanson, P. I. (2015). Access of torsinA to the inner nuclear  
841 membrane is activity dependent and regulated in the endoplasmic reticulum. *Journal of Cell*  
842 *Science*, 128(15), 2854–2865. <https://doi.org/10.1242/jcs.167452>
- 843 Goodchild, R. E., & Dauer, W. T. (2004). Mislocalization to the nuclear envelope: An effect of  
844 the dystonia-causing torsinA mutation. *Proceedings of the National Academy of Sciences of*  
845 *the United States of America*, 101(3), 847–852. <https://doi.org/10.1073/pnas.0304375101>
- 846 Goodchild, R. E., & Dauer, W. T. (2005). The AAA+ protein torsinA interacts with a conserved  
847 domain present in LAP1 and a novel ER protein. *Journal of Cell Biology*, 168(6), 855–862.  
848 <https://doi.org/10.1083/jcb.200411026>
- 849 Goodchild, R. E., Kim, C. E., & Dauer, W. T. (2005). Loss of the dystonia-associated protein  
850 torsinA selectively disrupts the neuronal nuclear envelope. *Neuron*, 48(6), 923–932.

851 <https://doi.org/10.1016/j.neuron.2005.11.010>

852 György, B., Cruz, L., Yellen, D., Aufiero, M., Alland, I., Zhang, X., Ericsson, M., Fraefel, C., Li,  
853 Y. C., Takeda, S., Hyman, B. T., & Breakefield, X. O. (2018). Mutant torsinA in the  
854 heterozygous DYT1 state compromises HSV propagation in infected neurons and  
855 fibroblasts. *Scientific Reports*, 8(1). <https://doi.org/10.1038/s41598-018-19865-2>

856 Harding, H. (2003). Immortalization of MEF with SV40 T antigen. In *Internet*.

857 Harding, H. P., Zhang, Y., Bertolotti, A., Zeng, H., & Ron, D. (2000). Perk is essential for  
858 translational regulation and cell survival during the unfolded protein response. *Molecular*  
859 *Cell*, 5(5), 897–904. [https://doi.org/10.1016/S1097-2765\(00\)80330-5](https://doi.org/10.1016/S1097-2765(00)80330-5)

860 Hewett, J., Gonzalez-Agosti, C., Slater, D., Ziefer, P., Li, S., Bergeron, D., Jacoby, D. J.,  
861 Ozelius, L. J., Ramesh, V., & Breakefield, X. O. (2000). Mutant torsinA, responsible for  
862 early-onset torsion dystonia, forms membrane inclusions in cultured neural cells. *Human*  
863 *Molecular Genetics*. <https://doi.org/10.1093/hmg/9.9.1403>

864 Jankovic, J., & Tintner, R. (2001). Dystonia and parkinsonism. *Parkinsonism and Related*  
865 *Disorders*, 8(2), 109–121. [https://doi.org/10.1016/S1353-8020\(01\)00025-6](https://doi.org/10.1016/S1353-8020(01)00025-6)

866 Jokhi, V., Ashley, J., Nunnari, J., Noma, A., Ito, N., Wakabayashi-Ito, N., Moore, M. J., &  
867 Budnik, V. (2013). Torsin Mediates Primary Envelopment of Large Ribonucleoprotein  
868 Granules at the Nuclear Envelope. *Cell Reports*.  
869 <https://doi.org/10.1016/j.celrep.2013.03.015>

870 Jozefczuk, J., Drews, K., & Adjaye, J. (2012). Preparation of mouse embryonic fibroblast cells  
871 suitable for culturing human embryonic and induced pluripotent stem cells. *Journal of*  
872 *Visualized Experiments*. <https://doi.org/10.3791/3854>

873 Jungwirth, M., Dear, M. L., Brown, P., Holbrook, K., & Goodchild, R. (2010). Relative tissue

874 expression of homologous torsinB correlates with the neuronal specific importance of  
875 DYT1 dystonia-associated torsinA. *Human Molecular Genetics*, 19(5), 888–900.  
876 <https://doi.org/10.1093/hmg/ddp557>

877 Jungwirth, M. T., Kumar, D., Jeong, D. Y., & Goodchild, R. E. (2011). The nuclear envelope  
878 localization of DYT1 dystonia torsinA-ΔE requires the SUN1 LINC complex component.  
879 *BMC Cell Biology*, 12. <https://doi.org/10.1186/1471-2121-12-24>

880 Khalil, B., Morderer, D., Price, P. L., Liu, F., & Rossoll, W. (2018). mRNP assembly, axonal  
881 transport, and local translation in neurodegenerative diseases. In *Brain Research* (Vol.  
882 1693, Issue Pt A, pp. 75–91). Elsevier B.V. <https://doi.org/10.1016/j.brainres.2018.02.018>

883 Kim, C. E., Perez, A., Perkins, G., Ellisman, M. H., & Dauer, W. T. (2010). A molecular  
884 mechanism underlying the neural-specific defect in torsinA mutant mice. *Proceedings of the*  
885 *National Academy of Sciences of the United States of America*.  
886 <https://doi.org/10.1073/pnas.0912877107>

887 Kim, J. E., Hong, Y. H., Kim, J. Y., Jeon, G. S., Jung, J. H., Yoon, B. N., Son, S. Y., Lee, K. W.,  
888 Kim, J. Il, & Sung, J. J. (2017). Altered nucleocytoplasmic proteome and transcriptome  
889 distributions in an in vitro model of amyotrophic lateral sclerosis. *PLoS ONE*, 12(4).  
890 <https://doi.org/10.1371/journal.pone.0176462>

891 Kustedjo, K., Bracey, M. H., & Cravatt, B. F. (2000). *Torsin A and its Torsion Dystonia-*  
892 *Associated Mutant Form Are Luminal Glycoproteins that Exhibit Distinct Subcellular*  
893 *Localizations Running title: Biochemical characterization of torsin A*. JBC Papers in Press.

894 Laudermitch, E., Tsai, P. L., Graham, M., Turner, E., Zhao, C., & Schlieker, C. (2016).  
895 Dissecting Torsin/cofactor function at the nuclear envelope: A genetic study. *Molecular*  
896 *Biology of the Cell*, 27(25), 3964–3971. <https://doi.org/10.1091/mbc.E16-07-0511>



- 897 Li, J., Liang, C. C., Pappas, S. S., & Dauer, W. T. (2020). TorsinB overexpression prevents  
898 abnormal twisting in DYT1 dystonia mouse models. *ELife*, 9.  
899 <https://doi.org/10.7554/eLife.54285>
- 900 Liang, C. C., Tanabe, L. M., Jou, S., Chi, F., & Dauer, W. T. (2014). TorsinA hypofunction  
901 causes abnormal twisting movements and sensorimotor circuit neurodegeneration. *Journal*  
902 *of Clinical Investigation*, 124(7), 3080–3092. <https://doi.org/10.1172/JCI72830>
- 903 Martin, J. N., Bair, T. B., Bode, N., Dauer, W. T., & Gonzalez-Alegre, P. (2009). Transcriptional  
904 and proteomic profiling in a cellular model of DYT1 dystonia. *Neuroscience*, 164(2), 563–  
905 572. <https://doi.org/10.1016/j.neuroscience.2009.07.068>
- 906 McQuin, C., Goodman, A., Chernyshev, V., Kamentsky, L., Cimini, B. A., Karhohs, K. W.,  
907 Doan, M., Ding, L., Rafelski, S. M., Thirstrup, D., Wiegraebe, W., Singh, S., Becker, T.,  
908 Caicedo, J. C., & Carpenter, A. E. (2018). CellProfiler 3.0: Next-generation image  
909 processing for biology. *PLoS Biology*. <https://doi.org/10.1371/journal.pbio.2005970>
- 910 Mootha, V. K., Lindgren, C. M., Eriksson, K. F., Subramanian, A., Sihag, S., Lehar, J.,  
911 Puigserver, P., Carlsson, E., Ridderstråle, M., Laurila, E., Houstis, N., Daly, M. J.,  
912 Patterson, N., Mesirov, J. P., Golub, T. R., Tamayo, P., Spiegelman, B., Lander, E. S.,  
913 Hirschhorn, J. N., ... Groop, L. C. (2003). PGC-1 $\alpha$ -responsive genes involved in oxidative  
914 phosphorylation are coordinately downregulated in human diabetes. *Nature Genetics*.  
915 <https://doi.org/10.1038/ng1180>
- 916 Naismith, T. V., Heuser, J. E., Breakefield, X. O., & Hanson, P. I. (2004). TorsinA in the nuclear  
917 envelope. *Proceedings of the National Academy of Sciences of the United States of*  
918 *America*, 101(20), 7612–7617. <https://doi.org/10.1073/pnas.0308760101>
- 919 Nery, F. C., Armata, I. A., Farley, J. E., Cho, J. A., Yaqub, U., Chen, P., Da Hora, C. C., Wang,

920 Q., Tagaya, M., Klein, C., Tannous, B., Caldwell, K. A., Caldwell, G. A., Lencer, W. I., Ye,  
921 Y., & Breakefield, X. O. (2011). TorsinA participates in endoplasmic reticulum-associated  
922 degradation. *Nature Communications*, 2(1). <https://doi.org/10.1038/ncomms1383>

923 Nery, F. C., Zeng, J., Niland, B. P., Hewett, J., Farley, J., Irimia, D., Li, Y., Wiche, G.,  
924 Sonnenberg, A., & Breakefield, X. O. (2008). TorsinA binds the KASH domain of nesprins  
925 and participates in linkage between nuclear envelope and cytoskeleton. *Journal of Cell*  
926 *Science*, 121(20), 3476–3486. <https://doi.org/10.1242/jcs.029454>

927 Ortega, J. A., Daley, E. L., Kour, S., Samani, M., Tellez, L., Smith, H. S., Hall, E. A., Esengul,  
928 Y. T., Tsai, Y. H., Gendron, T. F., Donnelly, C. J., Siddique, T., Savas, J. N., Pandey, U. B.,  
929 & Kiskinis, E. (2020). Nucleocytoplasmic Proteomic Analysis Uncovers eRF1 and  
930 Nonsense-Mediated Decay as Modifiers of ALS/FTD C9orf72 Toxicity. *Neuron*, 106(1),  
931 90-107.e13. <https://doi.org/10.1016/j.neuron.2020.01.020>

932 Ozelius, L. J., Hewett, J. W., Page, C. E., Bressman, S. B., Kramer, P. L., Shalish, C., De Leon,  
933 D., Brin, M. F., Raymond, D., Corey, D. P., Fahn, S., Risch, N. J., Buckler, A. J., Gusella, J.  
934 F., & Breakefield, X. O. (1997). The early-onset torsion dystonia gene (DYT1) encodes an  
935 ATP-binding protein. *Nature Genetics*. <https://doi.org/10.1038/ng0997-40>

936 Pappas, S. S., Liang, C. C., Kim, S., Rivera, C. A. O., & Dauer, W. T. (2018). TorsinA  
937 dysfunction causes persistent neuronal nuclear pore defects. *Human Molecular Genetics*.  
938 <https://doi.org/10.1093/hmg/ddx405>

939 Rampello, A. J., Laudermilch, E., Vishnoi, N., Prohet, S. M., Zhao, C., Patrick Lusk, C., &  
940 Schlieker, C. (2019). *Torsin ATPases are required to complete nuclear pore complex*  
941 *biogenesis in interphase 1 2*. <https://doi.org/10.1101/821835>

942 Rittiner, J. E., Caffall, Z. F., Hernández-Martinez, R., Sanderson, S. M., Pearson, J. L.,

943 Tsukayama, K. K., Liu, A. Y., Xiao, C., Tracy, S., Shipman, M. K., Hickey, P., Johnson, J.,  
944 Scott, B., Stacy, M., Saunders-Pullman, R., Bressman, S., Simonyan, K., Sharma, N.,  
945 Ozelius, L. J., ... Calakos, N. (2016). Functional Genomic Analyses of Mendelian and  
946 Sporadic Disease Identify Impaired eIF2 $\alpha$  Signaling as a Generalizable Mechanism for  
947 Dystonia. *Neuron*, 92(6), 1238–1251. <https://doi.org/10.1016/j.neuron.2016.11.012>

948 Ron, D. (2002). Translational control in the endoplasmic reticulum stress response. *Journal of*  
949 *Clinical Investigation*, 110(10), 1383–1388. <https://doi.org/10.1172/jci16784>

950 Ross Buchan, J. (2014). MRNP granules Assembly, function, and connections with disease. In  
951 *RNA Biology* (Vol. 11, Issue 8, pp. 1019–1030). Landes Bioscience.  
952 <https://doi.org/10.4161/15476286.2014.972208>

953 Saunders, C. A., Harris, N. J., Willey, P. T., Woolums, B. M., Wang, Y., McQuown, A. J.,  
954 Schoenhofen, A., Worman, H. J., Dauer, W. T., Gundersen, G. G., & Luxton, G. W. G.  
955 (2017). TorsinA controls TAN line assembly and the retrograde flow of dorsal perinuclear  
956 actin cables during rearward nuclear movement. *The Journal of Cell Biology*, 216(3), 657–  
957 674. <https://doi.org/10.1083/jcb.201507113>

958 Speese, S. D., Ashley, J., Jokhi, V., Nunnari, J., Barria, R., Li, Y., Ataman, B., Koon, A., Chang,  
959 Y. T., Li, Q., Moore, M. J., & Budnik, V. (2012). Nuclear envelope budding enables large  
960 ribonucleoprotein particle export during synaptic Wnt signaling. *Cell*, 149(4), 832–846.  
961 <https://doi.org/10.1016/j.cell.2012.03.032>

962 Subramanian, A., Tamayo, P., Mootha, V. K., Mukherjee, S., Ebert, B. L., Gillette, M. A.,  
963 Paulovich, A., Pomeroy, S. L., Golub, T. R., Lander, E. S., & Mesirov, J. P. (2005). Gene  
964 set enrichment analysis: A knowledge-based approach for interpreting genome-wide  
965 expression profiles. *Proceedings of the National Academy of Sciences of the United States*

- 966 *of America*, 102(43), 15545–15550. <https://doi.org/10.1073/pnas.0506580102>
- 967 Suzuki, K., Bose, P., Leong-Quong, R. Y., Fujita, D. J., & Riabowol, K. (2010). REAP: A two  
968 minute cell fractionation method. *BMC Research Notes*. [https://doi.org/10.1186/1756-0500-](https://doi.org/10.1186/1756-0500-3-294)  
969 3-294
- 970 Tanabe, L. M., Liang, C. C., & Dauer, W. T. (2016). Neuronal Nuclear Membrane Budding  
971 Occurs during a Developmental Window Modulated by Torsin Paralogs. *Cell Reports*,  
972 16(12), 3322–3333. <https://doi.org/10.1016/j.celrep.2016.08.044>
- 973 Tarsy, D., & Simon, D. K. (2006). Dystonia. *New England Journal of Medicine*.  
974 <https://doi.org/10.1056/NEJMra055549>
- 975 Torres, G. E., Sweeney, A. L., Beaulieu, J. M., Shashidharan, P., & Caron, M. G. (2004). Effect  
976 of torsinA on membrane proteins reveals a loss of function and a dominant-negative  
977 phenotype of the dystonia-associated  $\Delta E$ -torsinA mutant. *Proceedings of the National*  
978 *Academy of Sciences of the United States of America*, 101(44), 15650–15655.  
979 <https://doi.org/10.1073/pnas.0308088101>
- 980 Tribl, F., Gerlach, M., Marcus, K., Asan, E., Tatschner, T., Arzberger, T., Meyer, H. E.,  
981 Bringmann, G., & Riederer, P. (2005). “Subcellular proteomics” of neuromelanin granules  
982 isolated from the human brain. In *Molecular and Cellular Proteomics* (Vol. 4, Issue 7, pp.  
983 945–957). American Society for Biochemistry and Molecular Biology Inc.  
984 <https://doi.org/10.1074/mcp.M400117-MCP200>
- 985 van Harten, P. N., Hoek, H. W., & Kahn, R. S. (1999). Fortnightly review: Acute dystonia  
986 induced by drug treatment. *BMJ*, 319(7210), 623–626.  
987 <https://doi.org/10.1136/bmj.319.7210.623>
- 988 Vander Heyden, A. B., Naismith, T. V., Snapp, E. L., Hodzic, D., & Hanson, P. I. (2009).

- 989 LULL1 retargets torsinA to the nuclear envelope revealing an activity that is impaired by  
990 the DYT1 dystonia mutation. *Molecular Biology of the Cell*, 20(11), 2661–2672.  
991 <https://doi.org/10.1091/mbc.E09-01-0094>
- 992 VanGompel, M. J. W., Nguyen, K. C. Q., Hall, D. H., Dauer, W. T., & Rose, L. S. (2015). A  
993 novel function for the *Caenorhabditis elegans* torsin OOC-5 in nucleoporin localization and  
994 nuclear import. *Molecular Biology of the Cell*. <https://doi.org/10.1091/mbc.E14-07-1239>
- 995 Vasudevan, A., Breakefield, X. O., & Bhide, P. G. (2006). Developmental patterns of torsinA  
996 and torsinB expression. *Brain Research*, 1073–1074(1), 139–145.  
997 <https://doi.org/10.1016/j.brainres.2005.12.087>
- 998 Wühr, M., Güttler, T., Peshkin, L., McAlister, G. C., Sonnett, M., Ishihara, K., Groen, A. C.,  
999 Presler, M., Erickson, B. K., Mitchison, T. J., Kirschner, M. W., & Gygi, S. P. (2015). The  
1000 Nuclear Proteome of a Vertebrate. *Current Biology*, 25(20), 2663–2671.  
1001 <https://doi.org/10.1016/j.cub.2015.08.047>
- 1002 Zacchi, L. F., Wu, H. C., Bell, S. L., Millen, L., Paton, A. W., Paton, J. C., Thomas, P. J.,  
1003 Zolkiewski, M., & Brodsky, J. L. (2014). The bip molecular chaperone plays multiple roles  
1004 during the biogenesis of torsinA, an AAA ATPase associated with the neurological disease  
1005 early-onset torsion dystonia. *Journal of Biological Chemistry*, 289(18), 12727–12747.  
1006 <https://doi.org/10.1074/jbc.M113.529123>
- 1007 Zakirova, Z., Fanutza, T., Bonet, J., Readhead, B., Zhang, W., Yi, Z., Beauvais, G., Zwaka, T.  
1008 P., Ozelius, L. J., Blitzer, R. D., Gonzalez-Alegre, P., & Ehrlich, M. E. (2018). Mutations in  
1009 THAP1/DYT6 reveal that diverse dystonia genes disrupt similar neuronal pathways and  
1010 functions. *PLoS Genetics*, 14(1). <https://doi.org/10.1371/journal.pgen.1007169>
- 1011 Zhao, C., Brown, R. S. H., Chase, A. R., Eisele, M. R., & Schlieker, C. (2013). Regulation of

1012 Torsin ATPases by LAP1 and LULL1. *Proceedings of the National Academy of Sciences of*  
1013 *the United States of America*, 110(17). <https://doi.org/10.1073/pnas.1300676110>

1014 Zhao, C., Brown, R. S. H., Tang, C. H. A., Hu, C. C. A., & Schlieker, C. (2016). Site-specific  
1015 proteolysis mobilizes TorsinA from the membrane of the endoplasmic reticulum (ER) in  
1016 response to ER stress and B cell stimulation. *Journal of Biological Chemistry*, 291(18),  
1017 9469–9481. <https://doi.org/10.1074/jbc.M115.709337>

1018 Zhou, Y., Zhou, B., Pache, L., Chang, M., Khodabakhshi, A. H., Tanaseichuk, O., Benner, C., &  
1019 Chanda, S. K. (2019). Metascape provides a biologist-oriented resource for the analysis of  
1020 systems-level datasets. *Nature Communications*. [https://doi.org/10.1038/s41467-019-09234-](https://doi.org/10.1038/s41467-019-09234-6)  
1021 6

1022

1023

1024

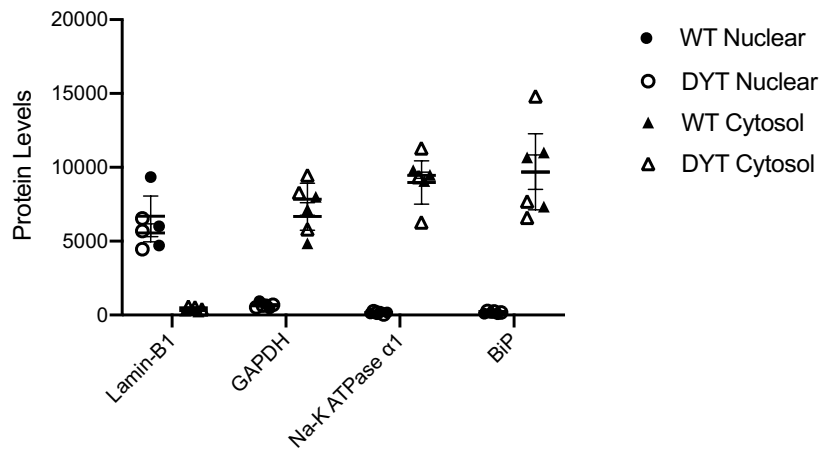

1025

1026 Fig. S1. Quantification of Western blot of WT and DYT-TOR1A samples under basal  
1027 conditions. Western blot protein level (a.u.) was quantified by densitometric analysis of the  
1028 fluorescent signal. N = 3 independent measures per condition.

**A**

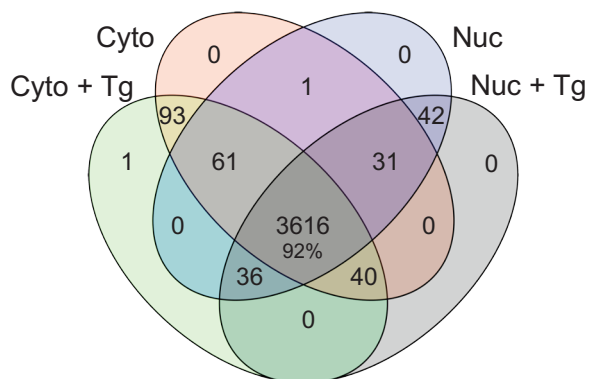

**B**

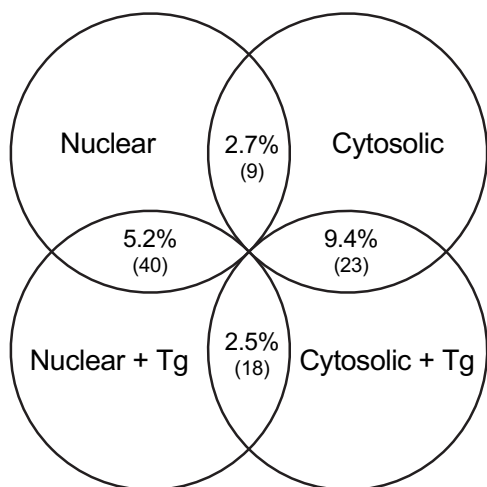

1029

1030

1031 Fig. S2. Overlap of LC/MS/MS identified proteins across experimental conditions. (A) Overlap

1032 of LC/MS/MS identified proteins between nuclear and cytosolic fractions treated with either Tg

1033 or Veh. (B) Pairwise overlap of DYT-disrupted proteins between nuclear and cytosolic fractions

1034 treated with either Tg or Veh.

1035



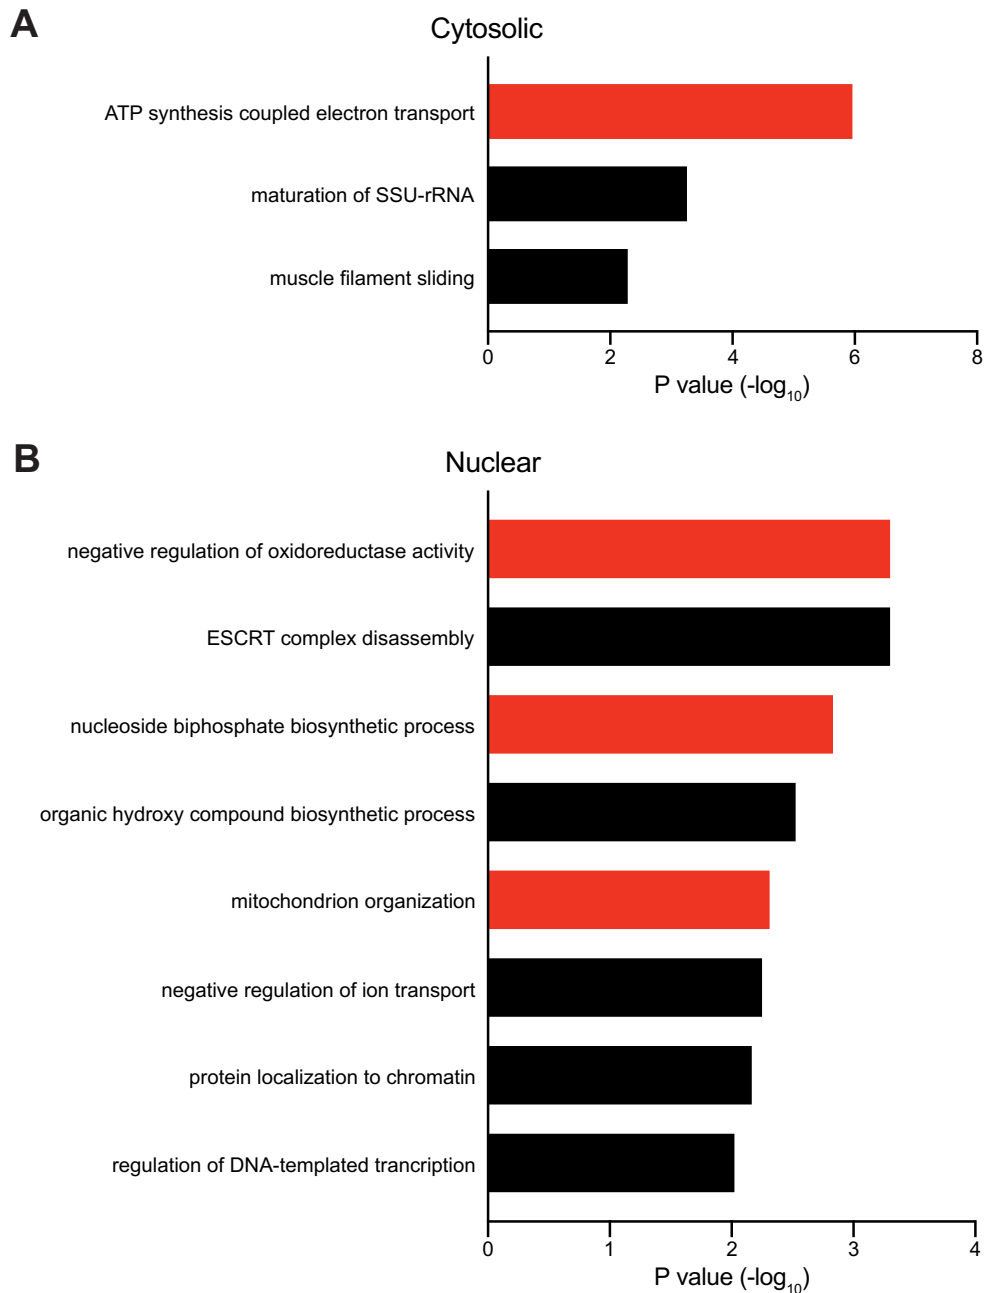

1036

1037 Fig. S3. Gene Ontology analysis of DYT-TOR1A genotype-dependent proteome disruptions. (A)

1038 Gene Ontology analysis of the 152 cytosolic fraction proteins showing DYT-TOR1A/WT or

1039 WT/DYT-TOR1A FC > 1.5 and p < 0.05. (B) Gene Ontology analysis of the 187 nuclear

1040 fraction showing DYT-TOR1A/WT or WT/DYT-TOR1A FC > 1.5 and p < 0.05. Red bars

1041 highlight Gene Ontology terms associated with mitochondrial organization or ATP metabolism.

1042

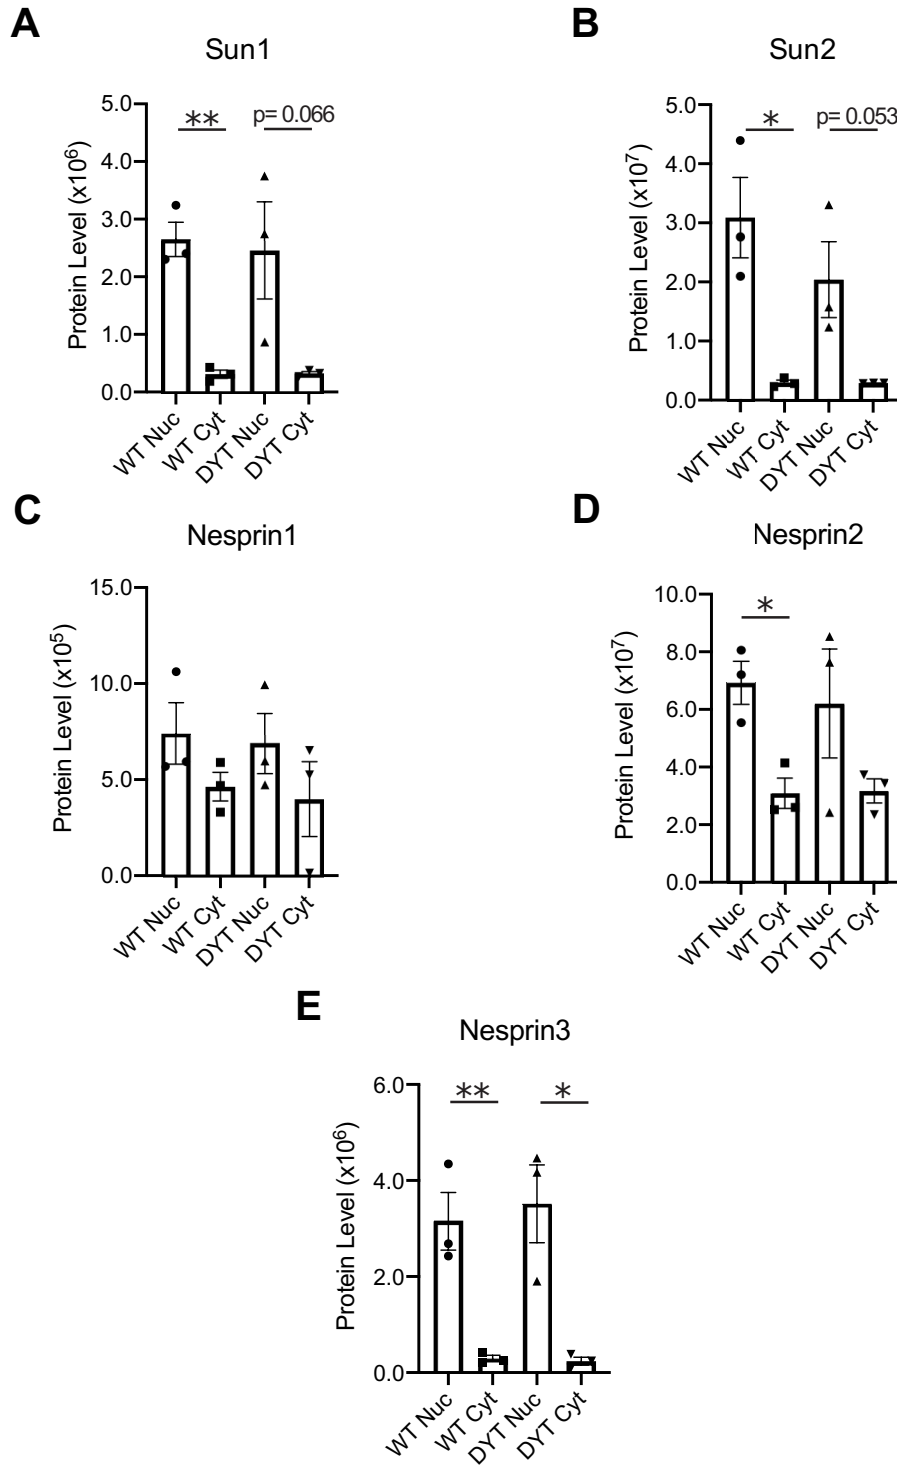

1043

1044 Fig. S4. LINC proteins fractionation across genotype following Veh treatment. Protein levels in  
1045 the nuclear and cytosolic fractions of both WT and DYT-TOR1A cell lines for (A) Sun1, (B)  
1046 Sun2, (C) Nesprin1, (D) Nesprin2, and (E) Nesprin3. Significance was determined by unpaired t-  
1047 test (n=3 biological replicates; \*p<0.05; \*\*p<0.01).  
1048

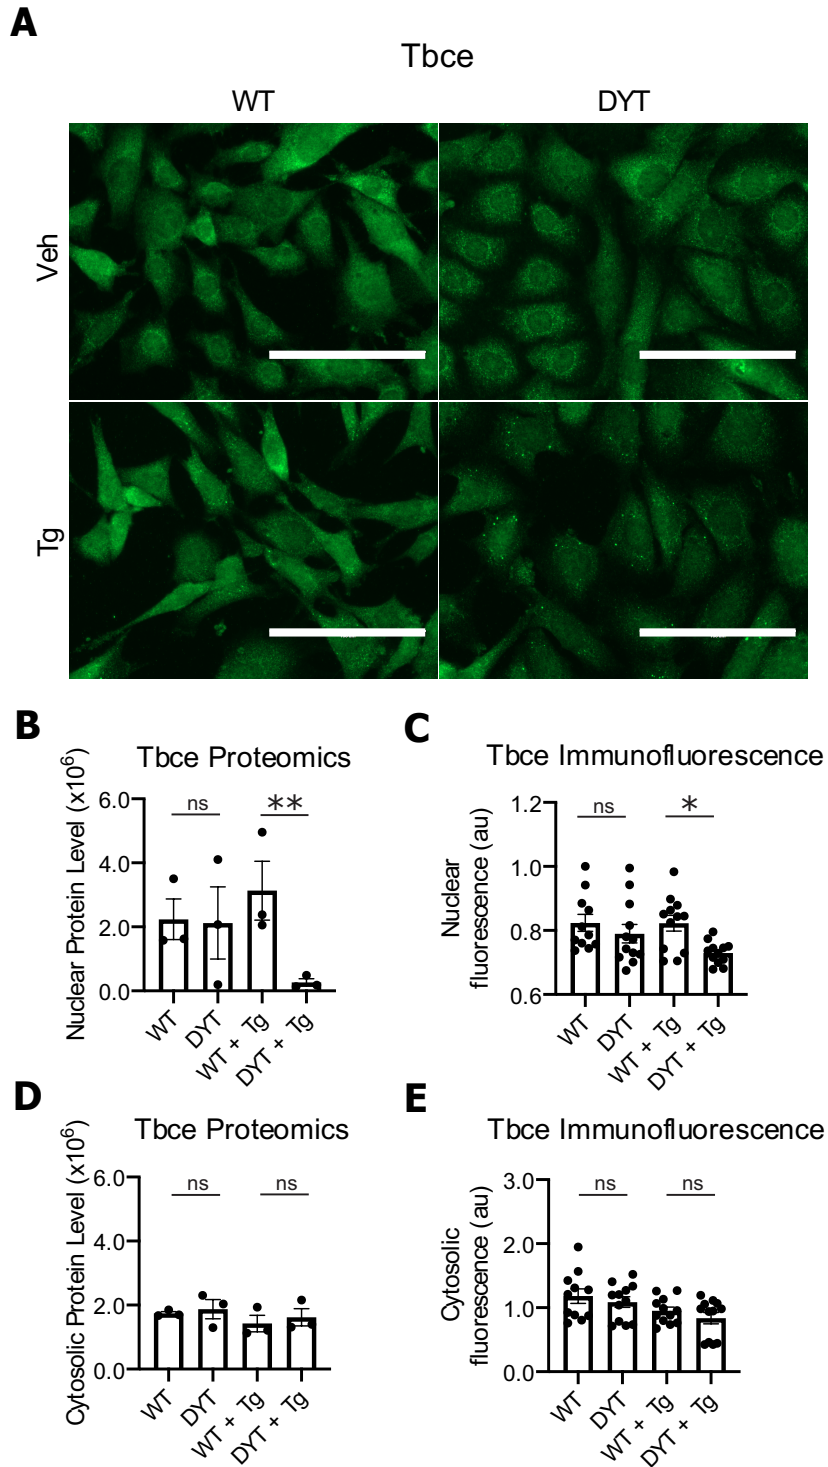

1049

1050 Fig. S5. Quantification of Tbce protein by immunocytochemical staining. (A) Representative

1051 images of Tbce immunofluorescence in WT and DYT-TOR1A MEF lines treated with either

1052 Veh or Tg. (Scale bar = 100  $\mu$ m) (B) Quantitative proteomics data on Tbce protein levels within  
1053 the nuclear fractions. (C) Quantification of Tbce immunofluorescence within the nucleus. (D)  
1054 Quantitative proteomics data on Tbce protein levels within the cytosolic fractions. (E)  
1055 Quantification of Tbce immunofluorescence within the cytosol. For the proteomics data,  
1056 significance was determined by unpaired t-test (n=3 biological replicates; \*\*p<0.01). For the  
1057 immunofluorescence data, significance was determined by unpaired t-test (n=12 biological  
1058 replicates with 4 distinct wells being quantified for each of the three unique cell lines per  
1059 genotype; \*p<0.05).  
1060

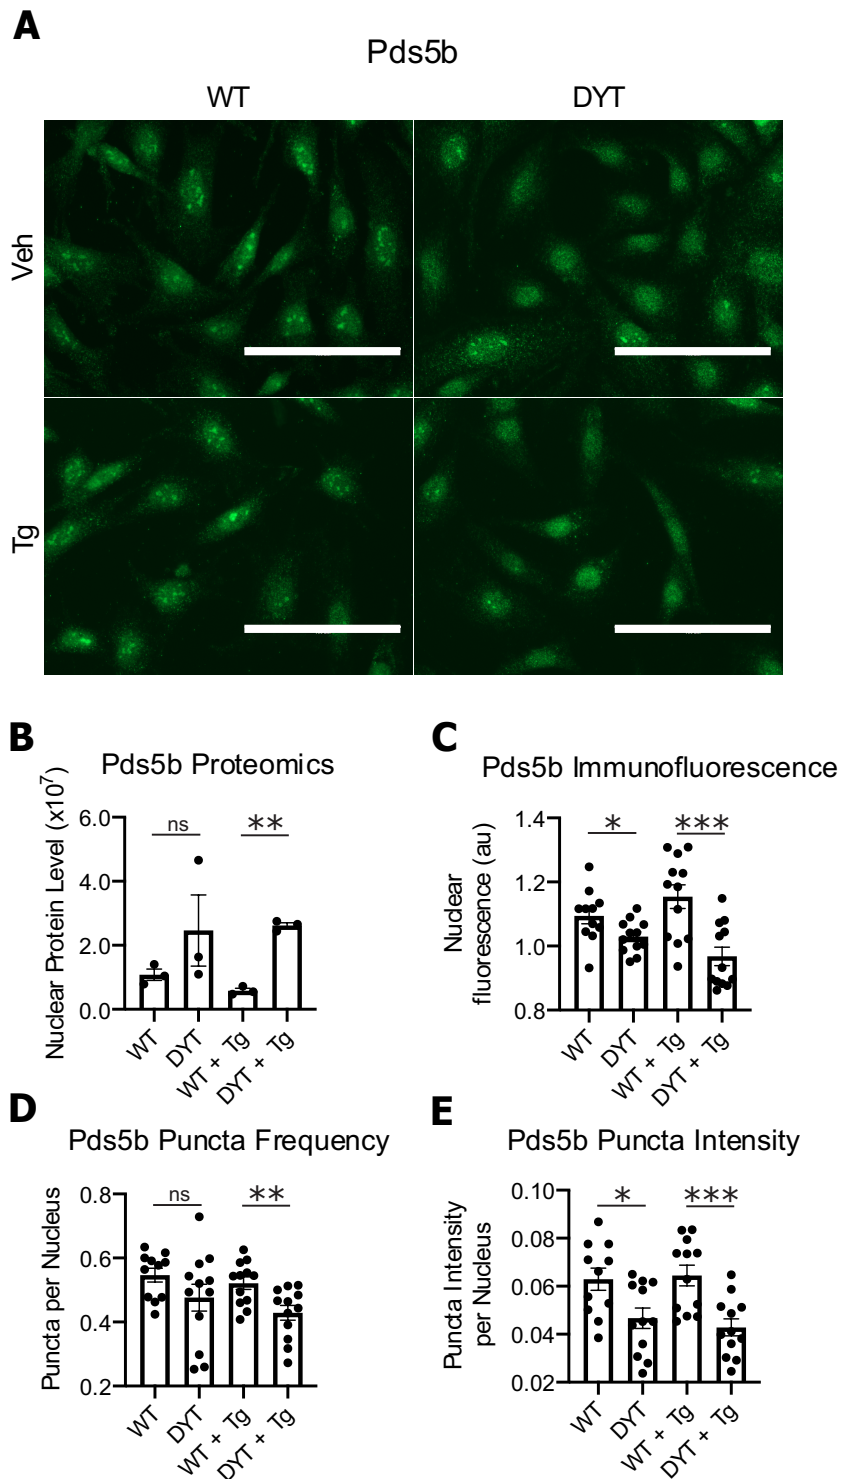

1061

1062 Fig. S6. Quantification of Pds5b protein by immunocytochemical staining. (A) Representative

1063 images of Pds5b immunofluorescence in WT and DYT-TOR1A MEF lines treated with either

1064 Veh or Tg. (Scale bar = 100  $\mu$ m) (B) Quantitative proteomics data on Pds5b protein levels  
1065 within the nuclear fractions. (C) Quantification of Pds5b immunofluorescence within the  
1066 nucleus. (D) Quantification of Pds5b puncta frequency within the nucleus. (E) Quantification of  
1067 cumulative Pds5b puncta intensity within the cell nucleus. For the proteomics data, significance  
1068 was determined by unpaired t-test (n=3 biological replicates; \*\*p<0.01). For the  
1069 immunofluorescence data, significance was determined by unpaired t-test (n=12 biological  
1070 replicates with 4 distinct wells being quantified for each of the three unique cell lines per  
1071 genotype; \*p<0.05, \*\*\*p<0.001).  
1072

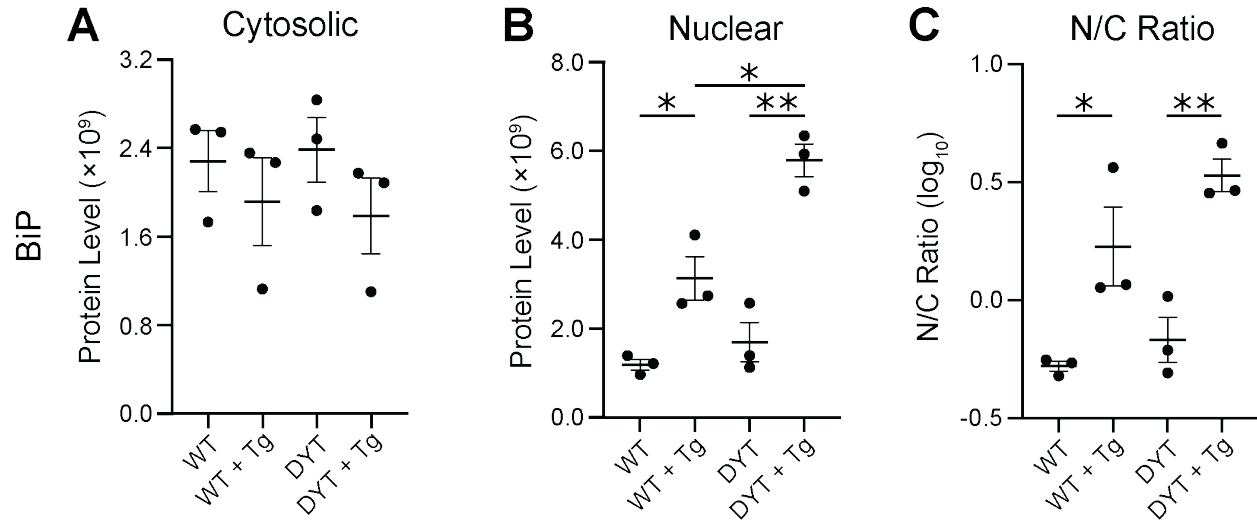

1073

1074

1075 Fig. S7. Genotype and Tg stress effects on subcellular fractionation of BiP. (A-B) LC/MS/MS

1076 quantified relative protein abundance of BiP in the cytosolic (A) and nuclear (B) fraction. (C)

1077 Ratio of nuclear/cytosolic protein levels. Significance was determined via unpaired t-test (n=3

1078 biological replicates; \*p<0.05; \*\*p<0.01)

1079

1080
